# Supplementary material for: Cluster randomized evaluation of Adolescent Girls Empowerment Programme (AGEP): study protocol
Source: BMC Public Health. 2017 May 5;17:386. doi: 10.1186/s12889-017-4280-1 (PMC5420151; doi:10.1186/s12889-017-4280-1)
Supplement: Additional file 1: — AGEP Baseline Survey. (XLSX 2922 kb) [file 12889_2017_4280_MOESM1_ESM.xlsx]

## Sheet: AGEPCoverCodeSheet
AGEP CODES SHEET
	RESULT CODES
	Final Result Codes
	1	=		Completed at household																				Additional codes - Anthropometry
	2	=		Completed at other location																				16	=		Child refused
	3	=		Resondent refused																				17	=		Child incapable physically or mentally
	4	=		Parent/Guardian refused
	5	=		Husband refused																				Additional codes - Biomarkers
	6	=		Other refused																				18	=		Refused, already tested
	7	=		Age out of range (<10 or > 19 years)																				19	=		Refused, other reason
	8	=		Ever married or living with a man as if married
	9	=		Incapable physically or mentally
	10	=		Respondent died
	11	=		Household located, respondent not trackable
	12	=		Household not located (final code)
	13	=		Household destroyed
	14	=		Not applicable
	15	=		Other (specified in misc info)
	Revisit Result Codes
	21	=		Partially complete																				Additional codes - Anthropometry
	22	=		Household not located																				28	=		Child not present
	23	=		Household located, posponed
	24	=		Household located, No HH member available
	25	=		Household located, Respondent not available
	26	=		Privacy not obtained
	27	=		Other (specified in misc info)
	RELATIONSHIP CODES
	00 Self											06 Bio Sister/Brother												12 Cousin											18 Spouse's Other Wife
	01 Spouse/Cohab Partner											07 Step Sister/Brother												13 Niece/Nephew											19 Other Relative
	02 Bio Daughter/Son											08 Maternal Uncle/Aunt												14 Grandchild											20 Friend
	03 Step/Adopt Daughter/Son											09 Paternal Uncle/Aunt												15 Brother In-Law											21 Neighbor
	04 Bio Mother/Father											10 Maternal Grandparent												16 Sister In-Law											22 Other Non-Relative
	05 Step Mother/Father											11 Paternal Grandparent												17 Mother/Father In-Law

## Sheet: CAPI
ENGLISH																																															NYANJA
			SECTION 1: RESPONDENT'S BACKGROUND
			QUESTIONS																					RESPONSES																					SKIPS
	101			RECORD THE TIME INTERVIEW BEGINS																					a.		HOUR																					101
				USE 24 HOUR TIME																							[6-20]
																									b.		MINUTES
																											[0-59]
	102			In what month and year were you born?																					a.		MONTH																					102
																											[1-12]
																											DON'T KNOW MONTH															88
																									b.		YEAR
																											[1993-2003]
																											DON'T KNOW YEAR														8888
	103			How old were you at your last birthday?																					AGE IN COMPLETED YEARS																							103
																									[10-19]
				COMPARE AND CORRECT 102 AND/OR 103 IF INCONSISTENT
																																											IF AGE IS 9 OR YOUNGER OR 20 OR OLDER		→	END INT
	104			Have you ever been married or lived together with a man as if married?																					YES																		1		→	END INT		104
																									NO																		2
	105			In what province were you born?																					CENTRAL																		1					105
																									COPPERBELT																		2
																									EASTERN																		3
																									LUAPULA																		4
																									LUSAKA																		5
																									NORTHERN																		6
																									NORTH-WESTERN																		7
																									SOUTHERN																		8
																									WESTERN																		9
																									MUCHINGA																	10
																									OUTSIDE ZAMBIA																	11
																									DON'T KNOW																	88
	106			What is the name of the place where you are currently living?																																												106
	107			How long have you been living continuously in [name of current place of residence]?																					YEARS																							107
																									[0-19]
																									ALWAYS																	77			→	110
				IF LESS THAN ONE YEAR, RECORD '0' YEARS																					DON'T KNOW																	88
	108			Just before you moved here, did you live in Lusaka, another city, in a town, or in a village?																					LUSAKA																		1					108
																									OTHER CITY																		2
																									TOWN																		3
																									VILLAGE																		4
	109			a.		What is the name of the place where you formerly lived?																																										109
				b.		What district is this place in?
				c.		What province is this place in?																			CENTRAL																		1
																									COPPERBELT																		2
																									EASTERN																		3
																									LUAPULA																		4
																									LUSAKA																		5
																									NORTHERN																		6
																									NORTH-WESTERN																		7
																									SOUTHERN																		8
																									WESTERN																		9
																									MUCHINGA																	10
																									OUTSIDE ZAMBIA																	11
																									DON'T KNOW																	88
	110			In the last 12 months, on how many separate occasions have you traveled away from your home community and slept away?																					NUMBER OF TRIPS																							110
																									[1-80]
																									NONE																	0			→	112
																									DON'T KNOW																	88
	111			In the last 12 months, have you been away from your home community for more than one month at a time?																					YES																		1					111
																									NO																		2
	112			What tribe do you belong to?																					a.	LOZI																	1					112
																									b.	NYANJA																	2
				RECORD ALL MENTIONED																					c.	TONGA																	3
																									d.	LUNDA																	4
																									e.	BEMBA																	5
																									f.	KAONDE																	6
																									g.	LUVALE																	7
																									h.	NON-ZAMBIAN																	8
																									i.	OTHER (SPECIFY_____)																96
	113			What language(s) do you speak at home?																																				YES			NO					113
																									a.		ENGLISH													1			2
				RECORD ALL MENTIONED																					b.		NYANJA													1			2
																									c.		BEMBA													1			2
																									d.		KAONDE													1			2
																									e.		TONGA													1			2
																									f.		LUVALE													1			2
																									g.		LUNDA													1			2
																									h.		LOZI													1			2
																									i.		OTHER (SPECIFY_____)													1			2
	114			Can you speak any other languages well enough to have a conversation? [IF YES, ASK:] Which ones?																																				YES			NO					114
																									a.		ENGLISH													1			2
																									b.		NYANJA													1			2
																									c.		BEMBA													1			2
				RECORD ALL MENTIONED																					d.		KAONDE													1			2
																									e.		TONGA													1			2
																									f.		LUVALE													1			2
																									g.		LUNDA													1			2
																									h.		LOZI													1			2
																									i.		OTHER (SPECIFY_____)													1			2
	115			What is your religion?																					CATHOLIC																		1					115
																									PROTESTANT																		2
																									MUSLIM																		3
																									NO RELIGION																		5		→	120
																									OTHER (SPECIFY_____)																	96
	116			When was the last time you attended religious services at a church or mosque?																					TODAY																		1					116
																									IN THE LAST WEEK																		2
																									IN THE LAST MONTH																		3
																									2-5 MONTHS AGO																		4
																									6 MONTHS OR MORE AGO																		5
																									NEVER																		6		→	118
	117			What is the name and denomination of the church/mosque you usually attend? Do you attend any other church/mosque?																																												117
				RECORD ALL MENTIONED
	118			What other religious activities have you done in the last month?																																				YES			NO					118
																									a.		CHOIR													1			2
																									b.		YOUTH GROUP													1			2
																									c.		BIBLE/KORAN STUDY													1			2
				READ ALL OPTIONS																					d.		PRAYER MEETING													1			2
																									e.		VISITING THE SICK													1			2
																									f.		REVIVAL MEETINGS													1			2
																									g.		EVANGELICAL WORK													1			2
																									h.		ISLAMIC SCHOOL/MADRASSA													1			2
																									i.		NIGHT PRAYERS													1			2
																									j.		FASTING													1			2
																									k.		OTHER (SPECIFY_____)													1			2
	119			[IF MUSLIM:] Have you made Tauba?																					YES																		1					119
																									NO																		2
				[IF CHRISTIAN:] Are you a born again Christian?
	120			[IF AGE IS 16-19:] Do you have a National Registration Card (NRC)?																					YES																		1					120
																									NO																		2
			SECTION 2: RESPONDENT'S BIOLOGICAL PARENTS
			QUESTIONS																					RESPONSES																					SKIPS
	201			Is your biological mother still living?																					YES																		1		→	203		201
																									NO																		2
																									DON'T KNOW																	88			→	208
	202			What age were you when she died?																					AGE																					ALL		202
																									[0-19]																				→	208
																									DON'T KNOW																	88
	203			Does your biological mother reside in the household in which you live?																					YES																		1					203
																									NO																		2
	204			What is your biological mother's current marital status?																					NEVER MARRIED																		1		→	206		204
																									MARRIED																		2
																									SEPARATED																		3		→	206
																									DIVORCED																		4		→	206
																									WIDOWED																		5		→	206
																									DON'T KNOW																	88			→	206
	205			Is your biological mother married to your biological father?																					YES																		1					205
																									NO																		2
																									DON'T KNOW																	88
	206			Does your biological mother work to earn cash to help support the family?																					YES																		1					206
																									NO																		2		→	208
																									DON'T KNOW																	88			→	208
	207			What type of activities does your biological mother do to earn cash to support the family?																																				YES			NO					207
																									a.		SUBSISTENCE FARMING													1			2
																									b.		COMMERCIAL FARMING													1			2
				RECORD ALL MENTIONED																					c.		LIVESTOCK FARMING													1			2
																									d.		MINE LABOR													1			2
																									e.		FORMAL/SALARIED EMPLOYMENT													1			2
																									f.		PIECEWORK													1			2
																									g.		SKILLED ARTISAN													1			2
																									h.		BUSINESS/SELF-EMPLOYMENT													1			2
																									i.		MARKET VENDOR/SELLERS													1			2
																									j.		DOMESTIC/COOK/GARDEN													1			2
																									k.		OTHER													1			2
	208			Did your biological mother ever attend school?																					YES																		1					208
																									NO																		2		→	210
																									DON'T KNOW																	88			→	210
	209			How many grades did your biological mother complete?																					GRADE																							209
																									[1-12]
																									HIGHER THAN SECONDARY																	13
																									DID NOT COMPLETE GRADE 1																		0
																									DON'T KNOW																	88
	210			Not including yourself, how many children that your biological mother gave birth to are still living?																					TOTAL NUMBER																							210
																									[1-20]
																									NONE																	0			→	212
																									DON'T KNOW																	88			→	213
	211			Of these living children, how many are older, younger, or the same age as you?																					a.		OLDER																					211
																											[0-20]
				CHECK CONSISTENCY BETWEEN 210 & 211																					b.		YOUNGER
																											[0-20]
																									c.		SAME AGE (TWINS)
																											[0-20]
	212			How many of the children that your biological mother gave birth to have died?																					TOTAL NUMBER																							212
																									[0-20]
																									DON'T KNOW																	88
	213			Is your biological father still living?																					YES																		1		→	215		213
																									NO																		2
																									DON'T KNOW																	88			→	221
	214			What age were you when he died?																					AGE																					ALL		214
																									[0-19]																				→	221
																									DON'T KNOW																	88
	215			Does your biological father reside in the household in which you live?																					YES																		1					215
																									NO																		2
				[IF 205 = YES → 218]
	216			What is your biological father's current marital status?																					NEVER MARRIED																		1		→	219		216
																									MARRIED																		2
																									SEPARATED																		3		→	219
																									DIVORCED																		4		→	219
																									WIDOWED																		5		→	219
																									DON'T KNOW																	88			→	219
	218			In total, how many women is your father currently married to?																					TOTAL NUMBER																							218
																									[1-20]
																									DON'T KNOW																	88
	219			Does your biological father work to earn cash to help support the family?																					YES																		1					219
																									NO																		2		→	221
																									DON'T KNOW																	88			→	221
	220			What type of activities does your biological father do to earn cash to support the family?																																				YES			NO					220
																									a.		SUBSISTENCE FARMING													1			2
																									b.		COMMERCIAL FARMING													1			2
				RECORD ALL MENTIONED																					c.		LIVESTOCK FARMING													1			2
																									d.		MINE LABOR													1			2
																									e.		FORMAL/SALARIED EMPLOYMENT													1			2
																									f.		PIECEWORK													1			2
																									g.		SKILLED ARTISAN													1			2
																									h.		BUSINESS/SELF-EMPLOYMENT													1			2
																									i.		MARKET VENDOR/SELLERS													1			2
																									j.		DOMESTIC/COOK/GARDEN													1			2
																									k.		OTHER													1			2
	221			Did your biological father ever attend school?																					YES																		1					221
																									NO																		2		→	223
																									DON'T KNOW																	88			→	223
	222			How many grades did your biological father complete?																					GRADE																							222
																									[1-12]
																									HIGHER THAN SECONDARY																	13
																									DID NOT COMPLETE GRADE 1																		0
																									DON'T KNOW																	88
	223			How many children that your biological father had with other women besides your biological mother are still living?																					TOTAL NUMBER																							223
																									[0-20]
																									NONE																	00			→	225
																									DON'T KNOW																	88			→	301
	224			Of these living children, how many are older, younger, or the same age as you?																					a.		OLDER																					224
																											[0-20]
				CHECK CONSISTENCY BETWEEN 223 & 224																					b.		YOUNGER
																											[0-20]
																									c.		SAME AGE
																											[0-20]
	225			How many of the children that your biological father had with other women besides your biological mother have died?																					TOTAL NUMBER																							225
																									[0-20]
																									DON'T KNOW																	88
			SECTION 3: RESPONDENT'S SCHOOLING
			QUESTIONS																					RESPONSES																					SKIPS
	301			Have you ever attended school?																					YES																		1					301
																									NO																		2		→	401
	302			At what age did you start primary school?																					AGE																							302
																									[4-19]
																									DON'T KNOW																	88
	303			What is the highest level of school you attended: primary, secondary, or higher (college/university)?																					PRIMARY																		1					303
																									SECONDARY																		2		→	305
																									HIGHER DIPLOMA																		3		→	306
				[IF HIGHER:] Did you attend a diploma, certificate, or degree program?																					HIGHER CERTIFICATE																		4		→	306
																									HIGHER DEGREE																		5		→	306
	304			What is the highest grade you completed at primary school?																					GRADE																				→	307		304
																									[1-7]
																									DID NOT COMPLETE GRADE 1																		0		→	313
	305			What is the highest grade you completed at secondary school?																					GRADE																				→	307		305
																									[8-12]
																									DID NOT COMPLETE GRADE 8																		0		→	307
	306			How many years of college or university have you completed?																					YEARS																							306
																									[1-7]
																									DID NOT COMPLETE YEAR 1																		0
				[IF 304 < 7 → 313]
	307			Did you ever take the Primary School Leaving Certificate Examination (PSLCE)?																					YES																		1					307
																									NO																		2		→	309
	308			What was your score?																					SCORE																							308
																									[0-888]
																									DON'T KNOW																	888
				[IF 303 = 1 OR 305 < 9 → 313]
	309			Did you ever take the Junior Secondary School Leaving Examination?																					YES																		1					309
																									NO																		2		→	311
	310			What was your score?																					SCORE																							310
																									[0-1000]
																									DON'T KNOW																8888
				[IF 305 < 12 → 313]
	311			Did you ever take the Zambian School Certificate exam?																					YES																		1					311
																									NO																		2		→	313
	312			What was your score?																					SCORE																							312
																									[6-54]
																									DON'T KNOW																	88
	313			Have you ever attended a trade or vocational school?																					YES																		1					313
																									NO																		2
	314			Have you attended school at any time during [the 2013/this] school year?																					YES																		1		→	317		314
																									NO																		2
	315			At what age did you stop attending school?																					AGE																							315
																									[4-19]
																									DON'T KNOW																	88
	316			What are the reasons that you left school when you did?																					SCHOOL ISSUES																							316
																								a	Finished primary school																	1
																								b	Not selected to secondary school																	2
				DO NOT READ LIST, CHECK ALL MENTIONED																				c	Finished secondary school																	3
																								d	Not doing well at school																	4
																								e	Don't like school/rather do something else																	5
																								f	Problems with/afraid of other students																	6
																								g	Problems with/afraid of teacher																	7
																								h	Travel/distance to school																	8
																								i	Parents/guardian don't want																	9				ALL
																									FINANCIAL/WORK																				→	331
																								j	Financial/Costs																	10
																								k	No money for development funds																	11
																								l	Need to work at home/fields																	12
																								m	Need to work/earn money																	13
																									MARRIAGE/BIRTH
																								n	Marriage																	14
																								o	Pregnancy																	15
																								p	Has baby/nursing baby																	16
																									ILLNESS/DEATH
																								q	Respondent sick/ill																	17
																								r	Illness of HH member																	18
																								s	Death of HH member																	19
																									HOUSEHOLD ISSUES
																								t	Need to look after brothers/sisters																	20
																									OTHER ISSUES
																								u	Other (specify)____________________																	96
	317			What is the name of the school you attend?																																												317
	318			Is this a primary, a secondary, a higher (college or university), or a trade or vocational school?																					PRIMARY																		1					318
																									SECONDARY																		2		→	320
																									HIGHER DIPLOMA																		3		→	323
				[IF HIGHER:] Are you in a diploma, certificate, or degree program?																					HIGHER CERTIFICATE																		4		→	323
																									HIGHER DEGREE																		5		→	323
																									TRADE/VOCATIONAL																		6		→	324
	319			Is this primary a community, government, mission, or private school?																					COMMUNITY																		1		→	321		319
																									GOVERNMENT																		2		→	321
																									MISSION																		3		→	321
																									PRIVATE																		4		→	321
	320			Is this secondary a community, government, mission, or private school?																					COMMUNITY																		1		→	322		320
																									GOVERNMENT																		2		→	322
																									MISSION																		3		→	322
																									PRIVATE																		4		→	322
	321			What grade in primary are you attending this year?																					GRADE																				→	324		321
																									[1-7]
	322			What grade in secondary are you attending this year?																					GRADE																				→	324		322
																									[8-12]
	323			What year of higher education are you attending this year?																					YEARS																							323
																									[1-7]
	324			Do you live at home, at boarding school, or somewhere else to attend school?																					LIVE AT HOME																		1					324
																									BOARDER AT SCHOOL																		2
																									LIVE SOMEWHERE ELSE																		3
	325			How did you get to school today/the last day you went to school?																					BY FOOT / WALKING																		1					325
																									OWN BICYCLE/HOUSEHOLD BICYCLE																		2
																									BICYCLE TAXI																		3
																									BUS/MINIBUS/OTHER PUBLIC TRANSPORT																		4
																									PRIVATE VEHICLE																		5
																									OTHER (SPECIFY_____)																	96
	326			How long did it take you to get to school today/the last day you went to school?																					a.		HOURS																					326
																											[0-5]
																									b.		MINUTES
																											[0-59]
																											DON'T KNOW															88
	327			During this school year, how many days of school have you missed?																					DAYS MISSED SCHOOL																							327
																									[1-80]
																									NONE																		0		→	331
																									DON'T KNOW																	88
	328			What were the reasons that you have been absent?																				a	STUDENT SICK/ILL																	1						328
																								b	YOUNGER BROTHER/SISTER SICK																	2
																								c	OTHER HOUSEHOLD MEMBER SICK																	3
				RECORD ALL MENTIONED																				d	MARKET DAY																	4
																								e	NEEDED TO WORK AT HOME																	5
																								f	NEEDED TO RUN ERRANDS FOR PARENTS																	6
																								g	UNIFORM DIRTY																	7
																								h	PROBLEMS WITH/AFRAID OTHER STUDENTS																	8
																								i	PROBLEMS WITH/AFRAID OF TEACHER																	9
																								j	MENSTRUATION																	10
																								k	RATHER DO SOMETHING ELSE																	11
																								l	WENT TO SEE/WAS WITH BOYFRIEND																	12
																								m	NEEDED TO WATCH BROTHERS/SISTERS																	13
																								n	BEREAVEMENT/FUNERAL																	14
																								o	OTHER (SPECIFY_____)																	96
	329			In the past two weeks, how many days was your school in session?																					DAYS																							329
																									[0-12]
	330			In the past two weeks, how many days did you attend school?																					DAYS																							330
																									[0-12]
	331			Now I would like to ask about each of the schools and grades you have attended.																					FILL IN SCHOOLING HISTORY SHEET																							331
			SECTION 4: WORK, SAVINGS, AND FINANCIAL LITERACY
			QUESTIONS																					RESPONSES																					SKIPS
	401			Yesterday, how much time did you spend doing household chores, such as cooking, cleaning, laundry, collecting firewood, water?																					a.		HOURS																					401
																											[0-24]
																									b.		MINUTES
																											[0-59]
																											DON'T KNOW															88
	402			Aside from your housework, have you done any work in the last seven days?																					YES																		1		→	406		402
																									NO																		2
	403			As you know, some girls take up jobs for which they are paid in cash or kind. Other sell things, have a small business or work on the family farm or in the family business. In the last seven days, have you done any of these things or any other work?																					YES																		1		→	406		403
																									NO																		2
	404			Just to be sure, in the last seven days, have you done any chores or activities for which you got paid or were given something in return (for example food, or other goods) or even if you were not paid?																					YES																		1		→	406		404
																									NO																		2
	405			Aside from your housework, have you done any work or chores or activities in the last 12 months?																					YES																		1					405
																									NO																		2
	406			How old were you the very first time you did any work or activity for pay, whether you were paid in cash or kind, or have you never done any work for pay?																					AGE																							406
																									[4-19]
																									DON'T KNOW AGE																	88
																									NEVER WORKED FOR PAY																		0
				[IF 405 = NO → 408:]
	407			Now I would like to ask about each of the different kinds of activities or work that you have done in the past year.																					FILL IN WORK AND WORK INCOME SHEET																							407
	408			I want to talk about the items that a person might own. Do you personally own or have these items?																					409																							408
																									Who last gave you [ITEM], gave you money to buy this item, or purchased this item for you?
				READ LIST; IF 'YES' ask 409																					USE THE FOLLOWING CODES:
																									[DO NOT READ LIST]
																									SELF- WITH MONEY EARNED																		1
																									MOTHER																		2
																									FATHER																		3
																									OTHER RELATIVE																		4
																									BOYFRIEND																		5
																									SUGAR DADDY																		6
																									MALE FRIEND																		7
																									FEMALE FRIEND																		8
																									GUARDIAN																		9
																									TEACHER																	10
																									OTHER																	11
																				YES		NO																	CODE
				a.		A BLANKET														1		2			a.		A BLANKET
				b.		A PAIR OF SHOES														1		2			b.		A PAIR OF SHOES
				c.		TWO SETS OF CLOTHES														1		2			c.		TWO SETS OF CLOTHES
				d.		A SCHOOL BAG														1		2			d.		A SCHOOL BAG
				e.		SOME JEWELRY														1		2			e.		SOME JEWELRY
				f.		HAIR CLIPS/RIBBONS														1		2			f.		HAIR CLIPS/RIBBONS
				g.		A MOBILE TELEPHONE														1		2			g.		A MOBILE TELEPHONE
				h.		A CLOCK OR A WRIST WATCH														1		2			h.		A CLOCK OR A WRIST WATCH
				i.		A BICYCLE														1		2			i.		A BICYCLE
	410s			Now I am going to ask you several questions about different issues related to your use of money, including spending money, and savings. We know that some girls have money to spend and save and others don’t. So, there are no right or wrong answers, just answer as honestly as you can.																																												410s
	410			In the past year, did you spend any money on your daily needs, other odds and ends, or other expenses?																					YES																		1					410
																									NO																		2		→	413
	411			In the past year, when you spent money on your daily needs, other odds and ends, or other expenses, where did you get that money from?																																				YES			NO					411
																									a.		MOTHER													1			2
																									b.		FATHER													1			2
																									c.		GUARDIAN YOU LIVE WITH													1			2
																									d.		OTHER RELATIVES													1			2
				RECORD ALL MENTIONED																					e.		FRIEND													1			2
																									f.		BOYFRIEND													1			2
																									g.		SUGAR DADDY													1			2
																									h.		STRETCHING MONEY													1			2
																									i.		OWN SAVINGS													1			2
																									j.		SAVINGS GROUP/ICHILIMBA													1			2
																									k.		CASUAL JOBS/CHORES													1			2
																									l.		STEADY JOB													1			2
																									m.		CASH TRANSFERS													1			2
																									n.		SPONSOR													1			2
																									o.		OTHER (SPECIFY________)													1			2
	412			Now I would like to ask about each of the things that you might have spent money on in the past year.																					FILL IN EXPENSES SHEET																							412
	413			Have you saved, or put money aside to use at a later time, in the past year?																					YES																		1					413
																									NO																		2		→	423
	414			Are you saving for something specific?																					YES																		1		→	418		414
																									NO																		2
	415			How many Kwacha have you saved already?																					REBASED KWACHA																							415
																									[List of ranges]
																									DON'T KNOW															88888
	416			How many more Kwacha would you like to save?																					REBASED KWACHA																							416
																									[List of ranges]
																									DON'T KNOW															88888
	417			How long do you think it will take you to save this amount of Kwacha?																					a.		YEARS																					417
																											[0-10]
																									b.		MONTHS																			ALL
																											[0-11]																		→	422
																									c.		DAYS
																											[0-29]
																											DON'T KNOW															88
	418			What are you saving for?																				419						420						421												418
																								How many Kwacha have you saved already for […]?						How many more Kwacha do you need to save to reach your savings goal for […]?						How long will it take you to save this amount that you need for [...]?
				DO NOT READ LIST
				IF 'YES' ASK 419, 420, and 421
																				YES		NO			KWACHA						KWACHA							YRS		MTS		DYS
																									REBASED						REBASED
																									[List of ranges]						[List of ranges]							[0-10]		[0-11]		[0-29]
				a.		EMERGENCIES														1		2		a.						a.							a.
				b.		PERSONAL ITEMS														1		2		b.						b.							b.
				c.		HOUSEHOLD EXPENSES														1		2		c.						c.							c.
				d.		OWN SCHOOL FEES														1		2		d.						d.							d.
				e.		SCHOOL FEES FOR OTHERS														1		2		e.						e.							e.
				f.		SCHOOL SUPPLIES														1		2		f.						f.							f.
				g.		OWN BUSINESS														1		2		g.						g.							g.
				h.		FAMILY BUSINESS														1		2		h.						h.							h.
				i.		GENERAL FUTURE USE														1		2		i.						i.							i.
				j.		AGRICULTURAL INPUTS														1		2		j.						j.							j.
				k.		MEDICAL EXPENSES FOR SELF														1		2		k.						k.							k.
				l.		MEDICAL EXPENSES FOR OTHER														1		2		l.						l.							l.
				m.		TRANSPORT/TRIPS														1		2		m.						m.							m.
				n.		OTHER (SPECIFY________)														1		2		n.						n.							n.
	422			Now I would like to ask about the places where you have saved your money in the past year.																					FILL IN SAVINGS SHEET																							422
	423			Does any member of your household, not including yourself, have a bank account or a loan from a bank?																					BANK ACCOUNT																		1					423
																									LOAN																		2
																									BANK ACCOUNT AND LOAN																		3
																									NO																		4		→	425
																									DON'T KNOW																	88			→	425
	424			What is the name of the bank(s) they use?																				a	ACCESS BANK																		1					424
																								b	BARCLAYS																		2
																								c	FINANCE BANK OF ZAMBIA																		3
				DO NOT READ LIST																				d	FIRST NATIONAL BANK (FNB)																		4
				RECORD ALL MENTIONED																				e	INDO BANK																		5
																								f	INVESTRUST BANK																		6
																								g	NATIONAL SAVINGS AND CREDIT BANK
																										(NATSAVE)																	7
																								h	STANBIC BANK																		8
																								i	STANDARD CHARTERED																		9
																								j	ZAMBIA NATIONAL COMMERCIAL BANK
																										(ZANACO)																10
																								k	OTHER																	11
																								l	DON'T KNOW																	88
	425			Now I’m going to read you a story and then ask you some questions about the story:																																												425
				"Each week, Anna Phiri sits down and plans what she will earn and spend in the next week. She writes down all the places where she will get money and all the things she will spend it on. Then she is able to see if she has enough money for all of what she wants to buy."
	426			Do you have such a plan?																					YES																		1					426
																									NO																		2		→	429
	427			Is your plan written down?																					YES																		1					427
																									NO																		2
	428			Would you say that you follow your plan all of the time, some of the time, rarely, or never?																					ALL OF THE TIME																		1					428
																									SOME OF THE TIME																		2
																									RARELY																		3
																									NEVER																		4
	429			What would you call that kind of plan?																					BUDGET																		1					429
																									SAVINGS PLAN																		2
																									FINANCIAL GOAL																		3
																									DON'T KNOW/OTHER																		88
	430			Now I’m going to read you another story and then ask you some questions about it:																																												430
				"Chilombo is 17 and has a sister, Pamela, who is married and lives in another town. Pamela just had a baby boy, and Chilombo is eager to visit her sister. Chilombo will need to save money for transport and a small hat for the baby. But she can’t take money from her savings because she is saving that money to start her own business. Hopefully, her neighbor will employ her to work extra days in her…
	431			What is one of Chilombo’s short term financial goals?																					TRANSPORT TO VISIT HER SISTER																		1					431
																									BUY A GIFT FOR HER NEPHEW																		2
																									START A BUSINESS																		3
																									OTHER																		4
																									DON'T KNOW																		88
	432			What is Chilombo’s long term financial goal?																					TRANSPORT TO VISIT HER SISTER																		1					432
																									BUY A GIFT FOR HER NEPHEW																		2
																									START A BUSINESS																		3
																									OTHER																		4
																									DON'T KNOW																		88
	433			What is one formal way of saving your money?																					BANK																		1					433
																									BANK ACCOUNT																		2
																									SAVINGS ACCOUNT																		3
																									HOMEBANK/UNDER MATTRESS/HOLE																		4
																									BOX/CLOSET																		5
																									WITH A FRIEND																		6
																									WITH A PARENT OR GUARDIAN																		7
																									IN A SAVINGS GROUP/KALOMBA/ICHILIMBA																		8
																									SHOPKEEPER																		9
																									INVESTMENTS																		10
																									DON'T KNOW																		88
	434			What is one informal way of saving your money?																					BANK																		1					434
																									BANK ACCOUNT																		2
																									SAVINGS ACCOUNT																		3
																									HOMEBANK/UNDER MATTRESS/HOLE																		4
																									BOX/CLOSET																		5
																									WITH A FRIEND																		6
																									WITH A PARENT OR GUARDIAN																		7
																									IN A SAVINGS GROUP/KALOMBA/ICHILIMBA																		8
																									SHOPKEEPER																		9
																									INVESTMENTS																		10
																									DON'T KNOW																		88
	435			Grace would like to buy a new notebook for the next school term which starts in eight weeks. If the notebook costs KR 10 and she can save KR 1 each week, will she reach her goal?																					YES																		1					435
																									NO																		2
	436			In the situation I described in the previous question, if Grace figured out how much she needed to save each week, and for how many weeks she needed to save in order to reach her goal, what would that be called?																					BUDGET																		1					436
																									SAVINGS PLAN																		2
																									FINANCIAL GOAL																		3
																									DON'T KNOW																		88
	437			If Grace discovered that she couldn’t reach her goal with that plan, what changes could she make so she would still reach her goal?																					BUY A CHEAPER NOTEBOOK																		1					437
																									SAVE MORE EACH WEEK																		2
																									GIVE HERSELF LONGER TIME TO REACH HER GOAL																		3
																									OTHER																		4
																									DON'T KNOW																		88
	438			Do you agree or disagree with the following statement: “Only people with a lot of money can save”?																					AGREE																		1					438
																									DISAGREE																		2
	439			If you could only spend money on one of the following, which would it be?																					SWEETS																		1					439
																									FOOD																		2
																									A NEW DRESS																		3
				READ ALL OPTIONS
	440			When there are weeks, for example, when you have met all your basic needs and at the end of the week you still have KR 10 remaining, what do you usually do with that money?																					SAVE/PUT ASIDE FOR FUTURE USE																		1					440
																									BUY SOMETHING EXTRA																		2
																									DON'T KNOW																		88
			SECTION 5: SOCIAL CAPITAL AND NETWORKS
			QUESTIONS																					RESPONSES																					SKIPS
	501			Are you a member of any social groups or clubs? For instance, are you a member of …?																					502											503												501
																									When is the last time you attended this club?											Do you hold an office or leadership position in this club?
				READ LIST; IF 'YES' ASK 502 and 503
																									1 = Within last 7 days
																									2 = Within the last month
																									3 = More than 1 month ago
																										LAST 7 DAYS			LAST MONTH			MORE 1 MONTH
																			YES			NO																	YES			NO
				a.		Gender club													1			2			a.		1			2			3			a.			1			2
				b.		Child rights/Human rights													1			2			b.		1			2			3			b.			1			2
				c.		HIV&AIDS/Health life skills/ Guidance & counseling club													1			2			c.		1			2			3			c.			1			2
				d.		Girl guides/scouts													1			2			d.		1			2			3			d.			1			2
				e.		Sports club													1			2			e.		1			2			3			e.			1			2
				f.		Drama or dancing group													1			2			f.		1			2			3			f.			1			2
				g.		Church group/Muslim group													1			2			g.		1			2			3			g.			1			2
				h.		Debate/wildlife/chess													1			2			h.		1			2			3			h.			1			2
				i.		Science club (e.g. JETS)													1			2			i.		1			2			3			i.			1			2
				j.		Any other ______________													1			2			j.		1			2			3			j.			1			2
				[FIRST ASK ALL QUESTIONS FOR MALES AND RECORD ANSWERS IN COLUMN A; THEN RETURN TO ASK ALL QUESTIONS FOR FEMALES AND RECORD ANSWERS IN COLUMN B]
				Now we want to ask about your good friends.
				[FRIENDS: 0-80; RECORD 80 IF MORE THAN 80; RECORD 88 IF DON'T KNOW]																				A.											B.
																								MALES											FEMALES
	504			How many good friends do you have who are [MALE/FEMALE]?																																												504
																								[IF = 0 → "FEMALES"]											[IF = 0 → 512]
	505			How many of these [MALE/FEMALE] friends are currently attending school?																																												505
																								[IF = 0 → 507]											[IF = 0 → 507]
																										[IF 301 = NO OR 314 = NO → 507]										[IF 301 = NO OR 314 = NO → 507]
	506			How many of these [MALE/FEMALE] friends are enrolled in your school?																																												506
	507			How many of these [MALE/FEMALE] friends could you count on if you needed to borrow money?																																												507
	508			How many of these [MALE/FEMALE] friends could you count on if you had a problem or in case of emergency?																																												508
				[IF AGE IS 10-14 → 512]
	509			How many of these [MALE/FEMALE] friends would you say have already started having sex?																																												509
	510			How many of these [MALE/FEMALE] friends are married?																																												510
	511			How many of these [MALE/FEMALE] friends have children of their own?																																												511
	512			[ADD THE NUMBER OF MALE AND FEMALE FRIENDS IN 504; IF THE TOTAL IS 0 → 601]																																												512
				Please take time to think about your three closest friends. Friends that you share information with and who you can trust with your personal information.																					FILL IN SOCIAL NETWORKS SHEET
			SECTION 6: SELF-EFFICACY, LOCUS OF CONTROL, AND GENDER ATTITUDES
			QUESTIONS																					RESPONSES																					SKIPS
			SELF-EFFICACY
				Now, I am going to read you some statements, please tell me if you agree or disagree with them.
	601			I can always manage to solve difficult problems if I try hard enough.																					AGREE																		1					601
																									DISAGREE																		2
	602			If someone is against me, I can still find ways to get what I want.																					AGREE																		1					602
																									DISAGREE																		2
	603			It is easy for me to focus on my aims and accomplish my goals.																					AGREE																		1					603
																									DISAGREE																		2
	604			I am confident that I could handle unexpected events very well.																					AGREE																		1					604
																									DISAGREE																		2
	605			Because of the help I can get, I know how to manage unexpected situations.																					AGREE																		1					605
																									DISAGREE																		2
	606			I can solve most problems if I make the necessary effort.																					AGREE																		1					606
																									DISAGREE																		2
	607			I can remain calm when facing difficulties because I can rely on my own abilities.																					AGREE																		1					607
																									DISAGREE																		2
	608			When I face a problem, I can usually find more than one solution.																					AGREE																		1					608
																									DISAGREE																		2
	609			If I am in trouble, I can usually think of a solution.																					AGREE																		1					609
																									DISAGREE																		2
	610			I can usually handle any situation that comes my way.																					AGREE																		1					610
																									DISAGREE																		2
			LOCUS OF CONTROL
				Now, I am going to read you two statements at a time, please tell me which of the two statements best reflects how you feel about yourself.
	611			A.	What happens to me is my own doing.																				SELECTED STATEMENT A																		1					611
																									SELECTED STATEMENT B																		2
				B.	Sometimes I feel that I don’t have enough control over the direction my life is taking.
	612			A.	When I make plans, I am almost certain that I can make them work.																				SELECTED STATEMENT A																		1					612
																									SELECTED STATEMENT B																		2
				B.	It is not always wise to plan too far ahead because many things turn out to be a matter of good or bad fortune.
	613			A.	In my case getting what I want has little or nothing to do with luck.																				SELECTED STATEMENT A																		1					613
																									SELECTED STATEMENT B																		2
				B.	Many times I might just as well decide what to do by trying my luck.
	614			A.	Many times I feel that I have little influence over the things that happen to me.																				SELECTED STATEMENT A																		1					614
																									SELECTED STATEMENT B																		2
				B.	It is impossible for me to believe that chance or luck plays an important role in my life.
				SOCIAL ASSETS AND SAFETY NETS
				I am going to read you a few more statements and ask if you agree or disagree with them.
	615			At times, you feel scared that you will be raped.																					AGREE																		1					615
																									DISAGREE																		2
	616			If you didn’t have a place to stay, there is someone in your neighborhood who would take you in.																					AGREE																		1					616
																									DISAGREE																		2
	617			In your neighborhood, boys or men tease you as you go about your activities.																					AGREE																		1					617
																									DISAGREE																		2
	618			There is a woman in your community, other than your mother or guardian, who you could turn to if you had a serious problem.																					AGREE																		1					618
																									DISAGREE																		2
	619			There is a place in the community, other than your house, your friend’s house or school, where you feel safe to meet your girl friends.																					AGREE																		1					619
																									DISAGREE																		2
				MONEY MANAGEMENT
	620			You feel you make good decisions concerning how to manage your money.																					AGREE																		1					620
																									DISAGREE																		2
	621			Males are better at managing money than females.																					AGREE																		1					621
																									DISAGREE																		2
	622			Fathers in the family should decide on how family money is spent.																					AGREE																		1					622
																									DISAGREE																		2
				GENDER ATTITUDES
	623			It is as important for girls to complete secondary school as it is for boys.																					AGREE																		1					623
																									DISAGREE																		2
	624			When a family cannot afford to send all children to school, it is better to send boys than girls.																					AGREE																		1					624
																									DISAGREE																		2
	625			When a husband and wife disagree about the number of children to have, the husband's opinion matters more.																					AGREE																		1					625
																									DISAGREE																		2
	626			A girl should get married when she finds an appropriate partner, even if she is still in school.																					AGREE																		1					626
																									DISAGREE																		2
	627			Girls are as intelligent as boys.																					AGREE																		1					627
																									DISAGREE																		2
				ATTITUDES TOWARDS GENDER VIOLENCE
				I am now going to ask you to think about several situations involving a husband and a wife. When you think about these questions, please keep in mind that we are asking for your opinion about each situation, not your own personal experience.
	628			Sometimes a husband is annoyed or angered by things that his wife does. In your opinion, is a husband justified in hitting or beating his wife in the following situations:																																												628
																																							YES		NO		DK
				a.		If she goes out without telling him?																			a.		GOES OUT												1		2		88
				b.		If she neglects the children?																			b.		NEGL. CHILDREN												1		2		88
				c.		If she argues with him?																			c.		ARGUES												1		2		88
				d.		If she refuses to have sex with him?																			d.		REFUSES SEX												1		2		88
				e.		If she burns the food?																			e.		BURNS FOOD												1		2		88
			SECTION 7: SELF-REPORTED HEALTH
			QUESTIONS																					RESPONSES																					SKIPS
			HEALTH STATUS
	701			Overall, how would you rate your health in the past year?																					RECORD CLOSEST NUMBER FROM HEALTH SCALE [1-10]																							701
				[SHOW THE RESPONDENT THE "HEALTH STATUS" DIAGRAM AND EXPLAIN:]
				For example, if this end of the line [SHOW #1] means lots of health problems like serious diarrhea and really bad fevers, and this end [SHOW #10] means no health problem at all, where would you place yourself?
	702			Overall, how would you rate your health in the past month?																					RECORD CLOSEST NUMBER FROM HEALTH SCALE [1-10]																							702
				[REPEAT EXPLANATION AS IN 701]
	703			Have you had any health problems in the past month?																																												703
				[READ OPTIONS]																																				YES			NO
				a.		Fever																			a.		FEVER													1			2
				b.		Night sweat																			b.		NIGHT SWEAT													1			2
				c.		Rapid weight loss																			c.		WEIGHT LOSS													1			2
				d.		Recurring diarrhea (>3 days)																			d.		DIARRHEA													1			2
				e.		Recurring coughing or shortness of breath (>3 days)																			e.		COUGHING													1			2
				f.		Recurring vomiting (>3 days)																			f.		VOMITING													1			2
				g.		Recurring fatigue/weakness (>3 days)																			g.		FATIGUE													1			2
	704			Many different factors can prevent girls from getting medical advice or treatment for themselves. When you are sick and want to get medical advice or treatment, is each of the following a big problem or not?																																												704
																																								BIG PROBLEM
																																								YES			NO
				a.		Getting permission to go?																			a.		PERMISSION													1			2
				b.		Getting money needed for treatment?																			b.		MONEY													1			2
				c.		The distance to the health facility?																			c.		DISTANCE													1			2
				d.		Having to take transport?																			d.		TRANSPORT													1			2
				e.		Not wanting to go alone?																			e.		GO ALONE													1			2
				f.		Concern that there may not be a female health provider?																			f.		NO FEMALE PROVIDER													1			2
				g.		Concern that there may not be any health provider?																			g.		NO PROVIDER													1			2
				h.		Concern that there may be no drugs available?																			h.		NO DRUGS													1			2
	705			Are you covered by any health insurance/scheme?																					YES																		1					705
																									NO																		2		→	708
																									DON'T KNOW																	88			→	708
	706			What type of health insurance/scheme?																				a	MUTUAL HEALTH ORGANIZATION/																		1					706
																										COMMUNITY-BASED HEALTH INSURANCE
																								b	HEALTH INSURANCE THROUGH																		2
				RECORD ALL MENTIONED																						EMPLOYER
																								c	SOCIAL SECURITY																		3
																								d	OTHER PRIVATELY PURCHASED																		4
																										COMMERCIAL HEALTH INSURANCE
																								e	LOW COST PRE-PAYMENT SCHEME																		5
																								f	HIGH COST PRE-PAYMENT SCHEME																		6
																								g	OTHER (SPECIFY________)																	96
	707			In the past year, did you go to a health facility to get any type of health services?																					YES																		1					707
																									NO																		2		→	801
	708			Now I would like to ask about your visits to health facilities in the past year.																					FILL IN HEALTH SERVICES SHEET(S)																							708
			SECTION 8: REPRODUCTIVE HEALTH KNOWLEDGE AND CONTRACEPTION
			QUESTIONS																					RESPONSES																					SKIPS
	801			From one menstrual period to the next, are there certain days when a woman is more likely to become pregnant if she has sexual relations?																					YES																		1					801
																									NO																		2		→	803
																									DON'T KNOW																	88			→	803
	802			Is this time just before her period begins, during her period, right after her period has ended, or two weeks after her period?																					JUST BEFORE HER PERIOD BEGINS																		1					802
																									DURING HER PERIOD																		2
																									RIGHT AFTER HER PERIOD ENDS																		3
																									HALFWAY BETWEEN TWO PERIODS																		4
																									OTHER																		6
																									DON'T KNOW																	88
	803			Now I would like to talk about family planning – the various ways or methods that a couple can use to delay or avoid a pregnancy.																																[IF AGE IS 15-19 AND 803 IS YES:]												803
				Which ways or methods have you heard about?																																804
																																				Have you ever used [METHOD]?
				FOR METHODS NOT MENTIONED SPONTANEOUSLY, ASK:
				Have you heard of [METHOD]?
				a.		PILL: Women can take a pill every day to avoid becoming pregnant.																			YES, SPONT								1			YES							1
																									YES, RECOG								2			NO							2
																									NO								3
				b.		IUD: Women can have a loop or coil placed inside them by a doctor or a nurse.																			YES, SPONT								1			YES							1
																									YES, RECOG								2			NO							2
																									NO								3
				c.		INJECTABLES: Women can have an injection by a health provider that stops them from becoming pregnant for one or more months.																			YES, SPONT								1			YES							1
																									YES, RECOG								2			NO							2
																									NO								3
				d.		IMPLANTS: Women can have several small rods placed in their upper arm by a doctor or nurse which can prevent pregnancy for one or more years.																			YES, SPONT								1			YES							1
																									YES, RECOG								2			NO							2
																									NO								3
				e.		MALE CONDOM: Men can put a rubber sheath on their erect penis before sexual intercourse.																			YES, SPONT								1			YES							1
																									YES, RECOG								2			NO							2
																									NO								3
				f.		FEMALE CONDOM: Women can place a thin, transparent rubber in their vagina before sexual intercourse.																			YES, SPONT								1			YES							1
																									YES, RECOG								2			NO							2
																									NO								3
				g.		RHYTHM METHOD: Every month that a woman is sexually active she can avoid pregnancy by not having sexual intercourse on the days of the month she is most likely to get pregnant.																			YES, SPONT								1			YES							1
																									YES, RECOG								2			NO							2
																									NO								3
				h.		WITHDRAWAL: Men can pull out their penis from the vagina before ejaculation.																			YES, SPONT								1			YES							1
																									YES, RECOG								2			NO							2
																									NO								3
				i.		EMERGENCY CONTRACEPTION: As an emergency measure, women can take pills up to three days after having unprotected sex to avoid getting pregnant. These pills are also called "morning-after pills".																			YES, SPONT								1			YES							1
																									YES, RECOG								2			NO							2
																									NO								3
				[IF AGE IS 10-14 → 808]
	805			Are you currently doing something or using any method to delay or avoid getting pregnant?																					YES																		1					805
																									NO																		2		→	808
																									CURRENTLY PREGNANT																		3		→	808
	806			Which method are you using?																																					YES		NO					806
				RECORD ALL MENTIONED																					a.		PILL														1		2
																									b.		IUD														1		2
																									c.		INJECTABLES														1		2
																									d.		IMPLANTS														1		2
																									e.		MALE CONDOM														1		2
																									f.		FEMALE CONDOM														1		2
																									g.		RHYTHM METHOD														1		2
																									h.		WITHDRAWAL														1		2
																									i.		TRADITIONAL METHOD														1		2
																									j.		OTHER (SPECIFY_________)														1		2
	807			[ASK IF ANSWER YES TO PILL, IUD, INJECTABLES, IMPLANTS, MALE CONDOM OR FEMALE CONDOM IN 806:]																					GOVT. HOSPITAL																	11						807
																									GOVT. HEALTH CENTER																	12
																									HEALTH POST																	13
				Where did you obtain [CURRENT METHOD] the last time?																					OTHER PUBLIC																	16
																									PRIVATE HOSPITAL/SURGERY																	21				ALL
																									MISSION HOSPITAL/CLINIC																	22			→	811
																									PHARMACY																	23
																									PRIVATE DOCTOR																	24
																									OTHER PRIVATE MEDICAL																	26
																									SHOP																	31
																									CHURCH																	32
																									FRIEND/RELATIVE																	33
																									OTHER (SPECIFY______________)																	96
	808			Do you know of a place where you can obtain a method of family planning?																					YES																		1					808
																									NO																		2		→	811
	809			Where is that?																				a	GOVT. HOSPITAL																	11						809
				Any other place?																				b	GOVT. HEALTH CENTER																	12
																								c	HEALTH POST																	13
				RECORD ALL MENTIONED																				d	OTHER PUBLIC																	16
																								e	PRIVATE HOSPITAL/SURGERY																	21
																								f	MISSION HOSPITAL/CLINIC																	22
																								g	PHARMACY																	23
																								h	PRIVATE DOCTOR																	24
																								i	OTHER PRIVATE MEDICAL																	26
																								j	SHOP																	31
																								k	CHURCH																	32
																								l	FRIEND/RELATIVE																	33
																								m	OTHER (SPECIFY______________)																	96
	810			If you were interested in obtaining family planning, do you feel it would be easy, difficult or not possible to go to a place where you can obtain family planning?																					EASY																		1					810
																									DIFFICULT																		2
																									NOT POSSIBLE																		3
																									DON'T KNOW																	88
	811			[AGE CHECK:]																																												811
					[IF AGE IS 15-19 → SECTION 9, 901]																																								→	901
					[IF AGE IS 10-14 → SECTION 10, 1003]																																								→	1003
			SECTION 9: PREGNANCY AND BIRTHS
			QUESTIONS																					RESPONSES																					SKIPS
	901			Now I would like to ask you about all the births you have had during your life. Have you ever given birth?																					YES																		1					901
																									NO																		2
	902			Have you ever given birth to a boy or girl who was born alive but later died?																					YES																		1					902
																									NO																		2
				[IF 901 = NO AND 902 = NO → 904]
	903			How many births have you had in total during your life?																					TOTAL BIRTHS																							903
																									[1-5]
	904			Are you pregnant now?																					YES																		1					904
																									NO																		2		→	907
																									UNSURE/DON'T KNOW																	88			→	906
	905			How many months pregnant are you?																					MONTHS																							905
																									[0-10]
				RECORD NUMBER OF COMPLETED MONTHS																					DON'T KNOW																	88
	906			At the time you became pregnant, did you want to become pregnant then, did you want to wait until later, or did you not want to have any (more) children at all?																					THEN																		1					906
																									LATER																		2
																									NOT AT ALL																		3
	907			Have you ever had a pregnancy that miscarried, was aborted, or ended in a stillbirth?																					YES																		1					907
																									NO																		2
				[IF ALL OF 901, 902, 904, AND 907 = NO → SECTION 10, 1003]
	908			When you found out you were pregnant for the very first time, were you still attending school?																					YES																		1					908
																									NO																		2
				[IF 904 = YES → ASK 909-926 FOR CURRENT PREGNANCY]
				[IF 901 = YES OR 902 = YES OR 907 = YES → ASK 909-926 FOR LAST PREGNANCY]
																									CURRENT PREGNANCY											LAST PREGNANCY
	909			Now I would like to ask some questions about your [CURRENT/LAST] pregnancy.																				a	DOCTOR							11			a	DOCTOR						11						909
																								b	CLINICAL OFFICER							12			b	CLINICAL OFFICER						12
				Have you seen/did you see anyone for antenatal care for this pregnancy?																				c	NURSE/MIDWIFE							13			c	NURSE/MIDWIFE						13
																								d	TRADITIONAL BIRTH										d	TRADITIONAL BIRTH
				IF YES:																						ATTENDANT						21					ATTENDANT					21
				Whom did you see?																				e	OTHER							96			e	OTHER						96
				Anyone else?																				f	NO ONE							97			f	NO ONE						97			→	918
				RECORD ALL MENTIONED
	910			Where did you receive antenatal care for this pregnancy?																				a	YOUR HOME							11			a	YOUR HOME						11			→	912		910
																								b	OTHER HOME							12			b	OTHER HOME						12			→	912
																								c	GOVT. HOSPITAL							21			c	GOVT. HOSPITAL						21
				Anywhere else?																				d	GOVT. HEALTH										d	GOVT. HEALTH
																										CENTER						22					CENTER					22
				RECORD ALL MENTIONED																				e	GOVT. HEALTH										e	GOVT. HEALTH
																										POST						23					POST					23
																								f	OTHER PUBLIC							26			f	OTHER PUBLIC						26
																								g	PVT. HOSPITAL/										g	PVT. HOSPITAL/
																										CLINIC						31					CLINIC					31
																								h	MISSION HOSPITAL/										h	MISSION HOSPITAL/
																										CLINIC						32					CLINIC					32
																								i	OTHER PRIVATE							36			i	OTHER PRIVATE						36
																								j	OTHER							96			j	OTHER						96
	911			What is/are the name of the place(s) where you receive antenatal care?																																												911
	912			How many months pregnant were you when you first received antenatal care for this pregnancy?																					MONTHS											MONTHS												912
																									[0-10]											[0-10]
																									DON'T KNOW							88				DON'T KNOW						88
	913			How many times did you/have you receive antenatal care during this pregnancy?																					NUMBER OF TIMES											NUMBER OF TIMES												913
																									[1-20]											[1-20]
																									DON'T KNOW							88				DON'T KNOW						88
	914			As part of your antenatal care during this pregnancy, were any of the following done at least once?																																												914
																															YES		NO								YES		NO
				a.		Were you weighed?																			a.	WEIGHT					1		2			a.	WEIGHT				1		2
				b.		Was your height measured?																			b.	HEIGHT					1		2			b.	HEIGHT				1		2
				c.		Was your blood pressure measured?																			c.	BP					1		2			c.	BP				1		2
				d.		Did you give a urine sample?																			d.	URINE					1		2			d.	URINE				1		2
				e.		Did you give a blood sample?																			e.	BLOOD					1		2			e.	BLOOD				1		2
	915			During this pregnancy were you offered counselling and testing for the virus that causes AIDS?																					YES								1			YES							1					915
																									NO								2			NO							2
																									DON'T KNOW							88				DON'T KNOW						88
	916			During (any of) your antenatal care visit(s), were you told about the signs of pregnancy complications?																					YES								1			YES							1					916
																									NO								2			NO							2		→	918
																									DON'T KNOW							88				DON'T KNOW						88			→	918
	917			Were you told where to go if you had any of these complications?																					YES								1			YES							1					917
																									NO								2			NO							2
																									DON'T KNOW							88				DON'T KNOW						88
	918			During this pregnancy, were you given an injection in the arm to prevent the baby from getting tetanus, that is, convulsions after birth?																					YES								1			YES							1					918
																									NO								2			NO							2		→	920
																									DON'T KNOW							88				DON'T KNOW						88			→	920
	920			At any time before this pregnancy, did you receive any tetanus injections, either to protect yourself or another baby?																					YES								1			YES							1					920
																									NO								2			NO							2		→	923
																									DON'T KNOW							88				DON'T KNOW						88			→	923
	923			During this pregnancy, were you given or did you buy any iron tablets or iron syrup or folic acid?																					YES								1			YES							1					923
																									NO								2			NO							2		→	926
																									DON'T KNOW							88				DON'T KNOW						88			→	926
	925			In the last 7 days, how many days did you take your iron and folic acid tablet?																					DAYS																							925
																									[1-7]
	926			During this pregnancy, did you take any drug for intestinal worms?																					YES								1			YES							1					926
																									NO								2			NO							2
																									DON'T KNOW							88				DON'T KNOW						88
	927			Now I would like to record the names of all your births, whether still alive or not, starting with the first one you had.																																												927
				RECORD TWINS AND TRIPLETS ON SEPARATE COLUMNS
				ASK FOR NUMBER OF BIRTHS IN 903																					FIRST BIRTH											SECOND BIRTH
	928			What name was given to your (first/next) baby?																																												928
	929			Is [NAME] a boy or a girl?																					BOY								1			BOY							1					929
																									GIRL								2			GIRL							2
	930			Were any of these births twins?																					SINGLE								1			SINGLE							1					930
																									MULTIPLE								2			MULTIPLE							2
	931			In what month and year was [NAME] born?																					MONTH											MONTH												931
																									[1-12]											[1-12]
				PROBE: What is his/her birthday?																					YEAR			[2005-2013]								YEAR			[2005-2013]
																									DON'T KNOW							88				DON'T KNOW						88
	932			Was [NAME] weighed at birth?																					YES								1			YES							1					932
																									NO								2			NO							2		→	934
																									DON'T KNOW							88				DON'T KNOW						88			→	934
	933			How much did [NAME] weigh?																					KG FROM CARD											KG FROM CARD												933
				RECORD WEIGHT IN KILOGRAMS FROM HEALTH CARD, IF AVAILABLE
																											.											.
																									[1.000-6.000]											[1.000-6.000]
	934			Who assisted with the delivery of [NAME]?																				a	DOCTOR							11			a	DOCTOR						11						934
																								b	CLINICAL OFFICER							12			b	CLINICAL OFFICER						12
				Anyone else?																				c	NURSE/MIDWIFE							13			c	NURSE/MIDWIFE						13
																								d	TRADITIONAL BIRTH										d	TRADITIONAL BIRTH
				RECORD ALL MENTIONED																						ATTENDANT						21					ATTENDANT					21
																								e	RELATIVE/FRIEND							23			e	RELATIVE/FRIEND						23
																								f	OTHER							96			f	OTHER						96
																								g	NO ONE							97			g	NO ONE						97
	935			Where did you give birth to [NAME]?																					YOUR HOME							11				YOUR HOME						11			→	940		935
																									OTHER HOME							12				OTHER HOME						12			→	940
																									GOVT. HOSPITAL							21				GOVT. HOSPITAL						21
																									GOVT. HEALTH											GOVT. HEALTH
																										CENTER						22					CENTER					22
																									GOVT. HEALTH											GOVT. HEALTH
																										POST						23					POST					23
																									OTHER PUBLIC							26				OTHER PUBLIC						26
																									PVT. HOSPITAL/											PVT. HOSPITAL/
																										CLINIC						31					CLINIC					31
																									MISSION HOSPITAL/											MISSION HOSPITAL/
																										CLINIC						32					CLINIC					32
																									OTHER PRIVATE							36				OTHER PRIVATE						36
																									OTHER (SPECIFY)							96				OTHER (SPECIFY)						96			→	940
	936			What is the name of the place where you gave birth to [NAME]?																																												936
	940			In the two months after [NAME] was born, did any health care provider or a traditional birth attendant check on your health?																					YES								1			YES							1					940
																									NO								2			NO							2		→	942
	941			How long after delivery did the first check take place?																					HOURS											HOURS												941
																									[0-23]											[0-23]
				IF LESS THAN ONE DAY, RECORD HOURS																					DAYS											DAYS
				IF LESS THAN ONE WEEK, RECORD DAYS																					[0-6]											[0-6]
																									WEEKS											WEEKS
																									[0-10]											[0-10]
																									DON'T KNOW							88				DON'T KNOW						88
	942			In the two months after [NAME] was born, did any health care provider or a traditional birth attendant check on his/her health?																					YES								1			YES							1					942
																									NO								2			NO							2		→	944
																									DON'T KNOW							88				DON'T KNOW						88			→	944
	944			In the first two months after delivery, did you receive a vitamin A dose?																					YES								1			YES							1					944
																									NO								2			NO							2
																									DON'T KNOW							88				DON'T KNOW						88
				CHECK CHILD HEALTH CARD
	945			Did you ever breastfeed [NAME]?																					YES								1			YES							1					945
																									NO								2			NO							2		→	950
	946			How long after birth did you first put [NAME] to the breast?																					IMMEDIATELY							00				IMMEDIATELY						00						946
																									HOURS											HOURS
				IF LESS THAN ONE HOUR, RECORD '00' HOURS.																					[0-23]											[0-23]
				IF LESS THAN 24 HOURS, RECORD HOURS.
				OTHERWISE, RECORD DAYS.																					DAYS											DAYS
																									[0-30]											[0-30]
	947			In the first three days after delivery, was [NAME] given anything to drink other than breast milk?																					YES								1			YES							1					947
																									NO								2			NO							2		→	949
	948			What was [NAME] given to drink?																				a	MILK (OTHER THAN										a	MILK (OTHER THAN												948
																										BREASTMILK)							1				BREASTMILK)						1
				Anything else?																				b	PLAIN WATER								2		b	PLAIN WATER							2
																								c	SUGAR OR GLUCOSE										c	SUGAR OR GLUCOSE
				RECORD ALL LIQUIDS MENTIONED																						WATER							3				WATER						3
																								d	GRIPE WATER								4		d	GRIPE WATER							4
																								e	SUGAR-SALT-WATER										e	SUGAR-SALT-WATER
																										SOLUTION							5				SOLUTION						5
																								f	FRUIT JUICE								6		f	FRUIT JUICE							6
																								g	INFANT FORMULA								7		g	INFANT FORMULA							7
																								h	TEA/INFUSIONS								8		h	TEA/INFUSIONS							8
																								i	HONEY								9		i	HONEY							9
																								j	OTHER (SPECIFY)							96			j	OTHER (SPECIFY)						96
	949			For how many months did you breastfeed [NAME]?																					MONTHS											MONTHS												949
																									[0-36]											[0-36]
																									STILL											STILL
																										BREASTFEEDING						77					BREASTFEEDING					77
																									DON'T KNOW							88				DON'T KNOW						88
	950			How many months after birth did you start giving [NAME] solid food?																					MONTHS											MONTHS												950
																									[0-36]											[0-36]
																									NEVER/											NEVER/
																										NOT YET						77					NOT YET					77
																									DON'T KNOW							88				DON'T KNOW						88
	951			Is [NAME] still alive?																					YES								1			YES							1		→	953		951
																									NO								2			NO							2
	952			IF DEAD:																					DAYS											DAYS												952
				How old was [NAME] when he/she died?																					[0-30]											[0-30]
																									MONTHS											MONTHS										ALL
				RECORD DAYS IF LESS THAN 1 MONTH; MONTHS IF LESS THAN TWO YEARS; OR YEARS																					[0-24]											[0-24]									→	955
																									YEARS											YEARS
																									[0-8]											[0-8]
																									DON'T KNOW							88				DON'T KNOW						88
	953			IF ALIVE:																					AGE											AGE												953
				How old was [NAME] at his/her last birthday?																					[0-8]											[0-8]
				RECORD AGE IN COMPLETED YEARS
	954			Is [NAME] living with you?																					YES								1			YES							1					954
																									NO								2			NO							2
	955			Do you have a card where [NAME]'s vaccinations are written down?																					YES								1			YES							1					955
																									NO								2			NO							2
				IF YES: May I see it please?
	956			IF CARD IS AVAILABLE TAKE A PHOTO OF BOTH SIDES OF THE CARD, AND COPY INFORMATION FOR EACH VACCINE.																																												956
				Has [NAME] received any of the following vaccinations?
	957	a		BCG for TB (at birth)																					YES								1			YES							1					957	a
																									NO								2			NO							2
																									DON'T KNOW							88				DON'T KNOW						88
	957	b		Oral Polio Vaccine 0 (OPV 0)																					YES								1			YES							1					957	b
				(at birth to 13 days)																					NO								2			NO							2
																									DON'T KNOW							88				DON'T KNOW						88
	957	c		Oral Polio Vaccine 1 (OPV 1)																					YES								1			YES							1					957	c
				(at 6 weeks)																					NO								2			NO							2
																									CHILD TOO YOUNG											CHILD TOO YOUNG
																										/DIED						77					/DIED					77
																									DON'T KNOW							88				DON'T KNOW						88
	957	d		Oral Polio Vaccine 2 (OPV 2)																					YES								1			YES							1					957	d
				(at least 4 weeks after OPV 1)																					NO								2			NO							2
																									CHILD TOO YOUNG											CHILD TOO YOUNG
																										/DIED						77					/DIED					77
																									DON'T KNOW							88				DON'T KNOW						88
	957	e		Oral Polio Vaccine 3 (OPV 3)																					YES								1			YES							1					957	e
				(at least 4 weeks after OPV 2)																					NO								2			NO							2
																									CHILD TOO YOUNG											CHILD TOO YOUNG
																										/DIED						77					/DIED					77
																									DON'T KNOW							88				DON'T KNOW						88
	957	f		Oral Polio Vaccine 4 (OPV 4)																					YES								1			YES							1					957	f
				(at 9 months, only if OPV 0 was not given)																					NO								2			NO							2
																									CHILD TOO YOUNG											CHILD TOO YOUNG
																										DIED						77					DIED					77
																									DON'T KNOW							88				DON'T KNOW						88
	957	g		Pneomonoccal Conjugate Vaccine 1 (PCV 1)																					YES								1			YES							1					957	g
				(at 6 weeks)																					NO								2			NO							2
																									CHILD TOO YOUNG											CHILD TOO YOUNG
																										/DIED						77					/DIED					77
																									DON'T KNOW							88				DON'T KNOW						88
	957	h		Pneomonoccal Conjugate Vaccine 2 (PCV 2)																					YES								1			YES							1					957	h
				(at least 4 weeks after PCV 1)																					NO								2			NO							2
																									CHILD TOO YOUNG											CHILD TOO YOUNG
																										/DIED						77					/DIED					77
																									DON'T KNOW							88				DON'T KNOW						88
	957	i		Pneomonoccal Conjugate Vaccine 3 (PCV 3)																					YES								1			YES							1					957	i
				(at least 4 weeks after PCV 2)																					NO								2			NO							2
																									CHILD TOO YOUNG											CHILD TOO YOUNG
																										/DIED						77					/DIED					77
																									DON'T KNOW							88				DON'T KNOW						88
	957	j		DPT-HepB-Hib 1 for Diptheria, Tetanus, Pertussis, Hepatitis B, and Haemphilus Influenzae B																					YES								1			YES							1					957	j
																									NO								2			NO							2
																									CHILD TOO YOUNG											CHILD TOO YOUNG
				(at 6 weeks)																						/DIED						77					/DIED					77
																									DON'T KNOW							88				DON'T KNOW						88
	957	k		DPT-HepB-Hib 2 for Diptheria, Tetanus, Pertussis, Hepatitis B, and Haemphilus Influenzae B																					YES								1			YES							1					957	k
																									NO								2			NO							2
																									CHILD TOO YOUNG											CHILD TOO YOUNG
				(at least 4 weeks after DPT-HepB-Hib 1)																						/DIED						77					/DIED					77
																									DON'T KNOW							88				DON'T KNOW						88
	957	l		DPT-HepB-Hib 3 for Diptheria, Tetanus, Pertussis, Hepatitis B, and Haemphilus Influenzae B																					YES								1			YES							1					957	l
																									NO								2			NO							2
																									CHILD TOO YOUNG											CHILD TOO YOUNG
				(at least 4 weeks after DPT-HepB-Hib 2)																						/DIED						77					/DIED					77
																									DON'T KNOW							88				DON'T KNOW						88
	957	m		Measles (at 9 months)																					YES								1			YES							1					957	m
																									NO								2			NO							2
																									CHILD TOO YOUNG											CHILD TOO YOUNG
																										/DIED						77					/DIED					77
																									DON'T KNOW							88				DON'T KNOW						88
	957	n		Measles (at 18 months)																					YES								1			YES							1					957	n
																									NO								2			NO							2
																									CHILD TOO YOUNG											CHILD TOO YOUNG
																										/DIED						77					/DIED					77
																									DON'T KNOW							88				DON'T KNOW						88
	957	o		Rotavirus (ROTA) vaccine 1 for diarrhea																					YES								1			YES							1					957	o
				(at 6 weeks)																					NO								2			NO							2
																									CHILD TOO YOUNG											CHILD TOO YOUNG
																										/DIED						77					/DIED					77
																									DON'T KNOW							88				DON'T KNOW						88
	957	p		Rotavirus (ROTA) vaccine 2 for diarrhea																					YES								1			YES							1					957	p
				(at 4 weeks after ROTA 1)																					NO								2			NO							2
																									CHILD TOO YOUNG											CHILD TOO YOUNG
																										/DIED						77					/DIED					77
																									DON'T KNOW							88				DON'T KNOW						88
			SECTION 10: NUTRITION
			QUESTIONS																					RESPONSES																					SKIPS
				[IF AGE 10-14 → 1003]
	1001			RECORD NAME OF RESPONDENT'S YOUNGEST CHILD LIVING WITH HER.																																												1001
																									NO CHILD LIVING WITH RESPONDENT																		0		→	1003
	1002			Now I would like to ask you about liquids or foods [NAME FROM 1001] had yesterday during the day or at night. Did [NAME FROM 1001] (drink/eat):																																												1002
																																						YES		NO			DK
				a.		Plain water?																			a.		PLAIN WATER											1		2			88
				b.		Commercially produced infant formula?																			b.		FORMULA											1		2			88
				c.		Any (brand name of commercially fortified baby food, e.g., Vitaso and cerelac)? ASK TO SEE THE PACKET																			c.		BABY CEREAL											1		2			88
				d.		Any other porridge?																			d.		OTHER PORRIDGE											1		2			88
	1003			Now I would like to ask you about (other) liquids or foods that [NAME FROM 1001]/you may have had yesterday during the day or at night. I am interested in whether your child/you had the item even if it was combined with other foods. Did [NAME FROM 1001]/you drink (eat):																					[IF AGE 10-14 OR IF NO CHILD IN 1001, ONLY ASK FOR RESPONDENT]																							1003
																									NAME FROM 1001											RESPONDENT
																												YES		NO			DK					YES		NO			DK
				a.		Milk such as tinned, powdered, or fresh animal milk?																			a.			1		2			88			a.		1		2			88
				b.		Tea or coffee?																			b.			1		2			88			b.		1		2			88
				c.		Any other liquids?																			c.			1		2			88			c.		1		2			88
				d.		Bread, rice, noodles, or other foods made from grains?																			d.			1		2			88			d.		1		2			88
				e.		Pumpkin, carrots, squash or sweet potatoes that are yellow or orange inside?																			e.			1		2			88			e.		1		2			88
				f.		White potatoes, white yams, manioc, cassava, or any other foods made from roots?																			f.			1		2			88			f.		1		2			88
				g.		Any dark green, leafy vegetables (eg pumpkin leaves or rape)?																			g.			1		2			88			g.		1		2			88
				h.		Ripe mangoes, papayas, apricot, watermelon?																			h.			1		2			88			h.		1		2			88
				i.		Any other fruits or vegetables (eg bananas and tomato)?																			i.			1		2			88			i.		1		2			88
				j.		Liver, kidney, heart or other organ meats?																			j.			1		2			88			j.		1		2			88
				k.		Any meat, such as beef, pork, lamb, goat, chicken, or duck?																			k.			1		2			88			k.		1		2			88
				l.		Eggs?																			l.			1		2			88			l.		1		2			88
				m.		Fresh or dried fish or shellfish?																			m.			1		2			88			m.		1		2			88
				n.		Any foods made from beans, peas, lentils, or nuts?																			n.			1		2			88			n.		1		2			88
				o.		Cheese, yogurt or other milk products?																			o.			1		2			88			o.		1		2			88
				p.		Any oil, fats, or butter, or foods made with any of these?																			p.			1		2			88			p.		1		2			88
				q.		Any sugary foods such as chocolates, sweets, candies, pastries, cakes, or biscuits?																			q.			1		2			88			q.		1		2			88
				r.		Any other solid or semi-solid food?																			r.			1		2			88			r.		1		2			88
				[ASK ONLY IF CHILD IN 1001:]
	1004			How many times did [NAME FROM 1001] eat solid, semisolid, or soft foods other than liquids yesterday during the day or at night?																					NUMBER OF TIMES																							1004
																									[0-9; IF MORE THAN 9 RECORD 9]
																									DON'T KNOW																	88
	1005			Do you have the following items in your household?																																												1005
																																						YES		NO			DK
				a.		Salt																			a.		SALT											1		2			88
				b.		Sugar																			b.		SUGAR											1		2			88
			SECTION 11: HIV/AIDS AND OTHER STIs
			QUESTIONS																					RESPONSES																					SKIPS
	1101			Now I would like to talk about something else. Have you ever heard of an illness called AIDS?																					YES																		1					1101
																									NO																		2		→	1110
	1102			Can people reduce their chances of getting the AIDS virus by having just one uninfected sex partner who has no other sex partners?																					YES																		1					1102
																									NO																		2
																									DON'T KNOW																	88
	1103			Can people get the AIDS virus from mosquito bites?																					YES																		1					1103
																									NO																		2
																									DON'T KNOW																	88
	1104			Can people reduce their chance of getting the AIDS virus by using a condom every time they have sex?																					YES																		1					1104
																									NO																		2
																									DON'T KNOW																	88
	1105			Can people get the AIDS virus by sharing food with a person who has AIDS?																					YES																		1					1105
																									NO																		2
																									DON'T KNOW																	88
	1106			Can people reduce their chance of getting the AIDS virus by not having sexual intercourse at all?																					YES																		1					1106
																									NO																		2
																									DON'T KNOW																	88
	1107			Can people get the AIDS virus because of witchcraft or other supernatural means?																					YES																		1					1107
																									NO																		2
																									DON'T KNOW																	88
	1108			Is it possible for a healthy-looking person to have the AIDS virus?																					YES																		1					1108
																									NO																		2
																									DON'T KNOW																	88
	1109			Can the virus that causes AIDS be transmitted from a mother to her baby:																																												1109
																																						YES		NO			DK
				a.		During pregnancy?																			a.		DURING PREGNANCY											1		2			88
				b.		During delivery?																			b.		DURING DELIVERY											1		2			88
				c.		By breastfeeding?																			c.		BREASTFEEDING											1		2			88
	1110			[AGE CHECK:]																																												1110
					[IF AGE IS 15-19 AND 1101 = YES → CONTINUE WITH 1111]																																								→	1111
					[IF AGE IS 15-19 AND 1101 = NO → 1117]																																								→	1117
					[IF AGE IS 13-14 → SECTION 12, 1201]																																								→	1201
					[IF AGE IS 10-12 → END CAPI, 1310]																																								→	1310
	1111			I don't want to know the results, but have you ever been tested to see if you have the AIDS virus?																					YES																		1					1111
																									NO																		2		→	1115
	1112			When was the last time you were tested?																					LESS THAN 12 MONTHS AGO																		1					1112
																									12 - 23 MONTHS AGO																		2
																									2 OR MORE YEARS AGO																		3
	1113			The last time you had the test, did you yourself ask for the test, was it offered to you and you accepted, or was it required?																					ASKED FOR THE TEST																		1					1113
																									OFFERED AND ACCEPTED																		2
																									REQUIRED																		3
	1114			I don't want to know the results, but did you get the results of the test?																					YES																		1		→	1116		1114
																									NO																		2		→	1116
	1115			Do you know of a place where people can go to get tested for the AIDS virus?																					YES																		1					1115
																									NO																		2
	1116			Do you personally know someone who has or is suspected to have the AIDS virus?																					YES																		1					1116
																									NO																		2
	1117			Now I would like to ask you some questions about your health in the last 12 months. During the last 12 months, have you had a disease which you got through sexual contact?																					YES																		1					1117
																									NO																		2
																									DON'T KNOW																	88
	1118			Sometimes women experience a bad smelling abnormal genital discharge. During the last 12 months, have you had a bad smelling abnormal genital discharge?																					YES																		1					1118
																									NO																		2
																									DON'T KNOW																	88
	1119			Sometimes women have a genital sore or ulcer. During the last 12 months, have you had a genital sore or ulcer?																					YES																		1					1119
																									NO																		2
																									DON'T KNOW																	88
	1120			During the last 12 months, have you experienced burning or pain during urination?																					YES																		1					1120
																									NO																		2
																									DON'T KNOW																	88
	1121			During the last 12 months, have you experienced any itching in the genital area?																					YES																		1					1121
																									NO																		2
																									DON'T KNOW																	88
			SECTION 12: GBV/DOMESTIC VIOLENCE
			QUESTIONS																					RESPONSES																					SKIPS
	1201			Now I would like to ask you questions about some other important aspects of a girl's life. I know that some of these questions are very personal. However, your answers are crucial for helping understand the condition of girls in Zambia. Let me assure you that your answers are completely confidential and will not be told to anyone and no one else will know that you were asked these questions.																																												1201
	1202			Has anyone ever hit, slapped, kicked, or done anything else to hurt you physically?																					YES																		1					1202
																									NO																		2		→	1205
	1203			Who has hurt you in this way?																					1204																							1203
				Anyone else?																					In the last 12 months, how often have you been hit, slapped, kicked, or physically hurt by this/these person(s): often, only sometimes, or not at all?
				RECORD ALL MENTIONED
				IF 'YES' ASK 1204
																			YES			NO							OFTEN				SOMETIMES				ONCE						NOT AT ALL
				a.		MOTHER/STEP-MOTHER													1			2			a.				1				2				3				4
				b.		FATHER/STEP-FATHER													1			2			b.				1				2				3				4
				c.		SISTER/BROTHER													1			2			c.				1				2				3				4
				d.		OTHER RELATIVE													1			2			d.				1				2				3				4
				e.		CURRENT BOYFRIEND													1			2			e.				1				2				3				4
				f.		FORMER BOYFRIEND													1			2			f.				1				2				3				4
				g.		TEACHER													1			2			g.				1				2				3				4
				h.		OTHER													1			2			h.				1				2				3				4
	1205			As far as you know, did your father ever beat your mother?																					YES																		1					1205
																									NO																		2
																									DON'T KNOW																	88
	1206			[AGE CHECK:]																																												1206
					[IF AGE IS 13-14 → END CAPI, 1310]																																								→	1310
			SECTION 13: SUBJECTIVE EXPECTATIONS
			QUESTIONS																					RESPONSES																					SKIPS
	1301			I will ask you several questions about the chance or likelihood that certain events are going to happen. There are 10 stones in this cup. I would like you to choose some stones out of these 10 stones and put them on the plate to express what you think the chance is of a specific event happening.																																												1301
				One stone represents one chance out of 10. If you do not put any stones in the plate, it means you are sure that the event will NOT happen. As you add stones, it means that you think the chance that the event happens goes up. For example, if you put one or two stones, it means you think the event is not likely to happen but it is still possible or may happen. If you pick 5 stones, it means that i…
				Let me give you an example. Imagine that we are playing Nsolo. Say, when asked about the chance that you will win, you put 3 stones in the plate. This means that you believe you would usually win 3 out of 10 games if we play many times.
				I would like to ask some questions about some events and you will pick the number of stones from the cup and put them on the plate for your answer as to how likely you think they may have or will occur. There is no right or wrong answer, I just want to know what you think.
	1302			Pick the number of stones that reflects how likely you think it is that […]																																												1302
				a.		You will go to the market at least once within the next 2 days?																			a.		STONES [0-10]
				b.		You will go to the market at least once within the next 2 weeks or 14 days?																			b.		STONES [0-10]
				If respondent did not place any stones or placed all ten stones on the plate, make sure that this means that they are certain that [event] will or will not happen.
				Did respondent add any stones between a and b?
																									[IF YES → 1303]
				c.		Remember, as time goes by, you may find more time to go to the market. Therefore, you may want to add stones to the plate. Let me ask you again [repeat questions]. Now, add stones in the plate so that the number of stones in the plate reflects how likely you think it is that you will go the market at least once within 2 weeks?																			c.		STONES [0-10]
	1303			Now I would like to ask you about certain events that may or may not happen in your life. Pick the number of stones that expresses how likely it is that […]																																												1303
				a.		You will complete primary school (grade 7)?																			a.		STONES [0-10]
																											ALREADY COMPLETED															77
				b.		You will complete secondary school (grade 12)?																			b.		STONES [0-10]
																											ALREADY COMPLETED															77
				e.		[IF AGE 15-17:] You will give birth before your 18th birthday?																			e.		STONES [0-10]
																											ALREADY GAVE BIRTH															77
				f.		You will give birth before your 20th birthday?																			f.		STONES [0-10]
																											ALREADY GAVE BIRTH															77
	1304			At what age do you expect to get married?																					AGE																							1304
																									[10-50]
																									DON'T KNOW																	88
																									DON'T EXPECT TO GET MARRIED																	98
	1305			Now I would like to ask you about certain events about health that may or may not happen. Pick the number of stones that expresses how likely it is that […]																																												1305
				d.		That you will have enough food to eat all your meals every day for the next 30 days?																			d.		STONES [0-10]
						[IF 1101 = NO → 1306]
				e.		You will become infected with HIV within the next 12 months?																			e.		STONES [0-10]
				f.		You will become infected with HIV within your lifetime?																			f.		STONES [0-10]
				Did respondent add any stones between a and b?
																									[IF YES → 1306]
				g.		Remember, as time goes by, people may be more likely to get infected with HIV. Therefore, you may want to add stones to the plate. Let me ask you again [repeat questions]. Now, add stones in the plate so that the number of stones in the plate reflects how likely you think it is that you will become infected with HIV within your lifetime.																			g.		STONES [0-10]
	1306			Finally, I would like to ask you to consider the likelihood that you may not be alive as time goes by. We hope that nothing bad will happen to you, but nevertheless, something unfortunate may occur over the next year despite all precautions that you may take. Pick the number of stones that expresses how likely it is that […]																																												1306
				a.		You will die within a five year period beginning today?																			a.		STONES [0-10]
				b.		You will die within a ten year period beginning today?																			b.		STONES [0-10]
				Did respondent add any stones between a and b?
																									[IF YES → 1307]
				c.		Remember, as time goes by, people are more likely to die. Therefore, you may want to add stones to the plate. Let me ask you again the question again [repeat question]. Now, add stones in the plate so that the number of stones in the plate reflects how likely you think it is that you may die within ten years.																			c.		STONES [0-10]
	1307			At what age would you like to get married?																					AGE																							1307
																									[10-50]
																									DON'T KNOW																	88
																									DON'T WANT TO GET MARRIED																	98
	1308			If you could choose exactly the number of children to have in your whole life, how many would that be?																					NUMBER																							1308
																									[1-20]
																									NONE																	0
																									DON'T KNOW																	88
	1309			[AGE CHECK:]																																												1309
					[IF AGE IS 10-14 → END CAPI, 1310]																																								→	1310
					[IF AGE IS 15-19 → CONTINUE WITH ACASI]																																								→	ACASI
	1310			END CAPI: If you would like to discuss any of the questions or issues raised in this survey, please feel free to discuss this with the interviewer. The interviewer can provide information to contact a social welfare officer to discuss your concerns, or can contact the social welfare officer for you. Thank you very much for participating in this important study.																																												1310
[truncated: 9 more columns]

## Sheet: ACASI
ENGLISH																																															NYANJA
				ACASI: ONLY FOR AGES 15-19
				ACASI Break: Now you will be asked some questions using a computer. Please do not worry about using the computer, you will be shown how to use it and all of your questions will be answered before you start. The reason that we are asking you to use a computer is because some of the next questions may make you feel uncomfortable or embarrassed. We expect that you will feel more comfortable using a …
				Stop for ACASI training of respondent and ACASI respondent practice questions.
	INTRO1			Shortly, you will listen to a series of questions, for which you will be asked to provide answers. Select the response that best fits your situation; try to be as accurate as possible. If at any time you do not understand a question or have any other problems, feel free to stop and ask the interviewer for assistance. Okay? Let’s begin with a simple question for practice.																																												INTRO1
	P1			Are you male or female?																					MALE																		1					P1
																									FEMALE																		2
	P2			What is the name of the language you are listening to?																					ENGLISH																		1					P2
																									NYANJA																		2
																									BEMBA																		3
																									KAONDE																		4
	P3			What is your age in years?																					15 YEARS OLD																	15						P3
																									16 YEARS OLD																	16
																									17 YEARS OLD																	17
																									18 YEARS OLD																	18
																									19 YEARS OLD																	19
	INTRO2			Now we would like to ask you some specific questions about sexual intercourse and your sexual partners. We know the questions may make you feel uncomfortable and that it might be difficult to remember exactly, however, we would ask that you answer honestly and as best you can, as this information is very important for understanding the health of Zambians. Remember, your answers are completely con…																																												INTRO2
			SECTION A: SEXUAL ACTIVITY AND CONDOM USE
			QUESTIONS																					RESPONSES																					SKIPS
	A1			Have you ever had sexual intercourse with a boyfriend?																					YES																		1					A1
																									NO																		2
	A2			Have you ever had sexual intercourse with a "sugar daddy"?																					YES																		1					A2
																									NO																		2
	A3			Have you ever had sexual intercourse with a casual acquaintance?																					YES																		1					A3
																									NO																		2
	A4			Have you ever had sexual intercourse with a relative?																					YES																		1					A4
																									NO																		2
	A5			Have you ever had sexual intercourse with a teacher?																					YES																		1					A5
																									NO																		2
	A6			How old were you when you had sexual intercourse for the very first time?																					NEVER HAD SEXUAL																							A6
																										INTERCOURSE																	0		→	C1
																									AGE IN YEARS [5-19]
																									DON'T KNOW																	88
	A7			The first time you had sexual intercourse, were you still attending school?																					YES																		1					A7
																									NO																		2
																									DON'T KNOW/DON'T REMEMBER																	88
	A8			What was your relationship to the first person with whom you had sexual intercourse?																					BOYFRIEND																		1					A8
																									"SUGAR DADDY"																		2
																									CASUAL ACQUAINTANCE																		3
																									RELATIVE																		4
																									TEACHER																		5
																									SOMEONE ELSE																		6
	A9			Was the person you first had sexual intercourse with older than you, younger than you, or about the same age as you?																					OLDER																		1					A9
																									YOUNGER																		2		→	A11
																									ABOUT THE SAME AGE																		3		→	A11
																									DON'T KNOW/DON'T REMEMBER																	88			→	A11
	A10			Would you say this person was ten or more years older than you or less than ten years older than you?																					TEN OR MORE YEARS OLDER																		1					A10
																									LESS THAN TEN YEARS OLDER																		2
																									OLDER, UNSURE HOW MUCH																	3
	A11			The first time you had sexual intercourse, was a condom used?																					YES																		1					A11
																									NO																		2
																									DON'T KNOW/DON'T REMEMBER																	88
	A12			The first time you had sex did you want to have sex, not want to have sex, or you were unsure if you wanted to have sex?																					WANTED TO HAVE SEX																		1					A12
																									DID NOT WANT TO HAVE SEX																		2
																									UNSURE																		3
	A13			Now I would like to ask you some questions about your recent sexual activity. When was the last time you had sexual intercourse?																					TODAY/DAYS AGO																		1					A13
																									MORE THAN A WEEK AGO																		2		→	A16
																									MORE THAN A MONTH AGO																		3		→	A16
																									MORE THAN A YEAR AGO																		4		→	A22
	A14			In the last week, how many times did you have sex?																					TIMES HAD SEX [1-35]																							A14
																									DON'T KNOW																	88
	A15			Of those times you had sex in the last week, how many times did you use a condom?																					TIMES USED CONDOM [1-35]																							A15
																									DON'T KNOW																	88
	A16			What was your relationship to the last person with whom you had sexual intercourse?																					BOYFRIEND																		1					A16
																									"SUGAR DADDY"																		2
																									CASUAL ACQUAINTANCE																		3
																									RELATIVE																		4
																									TEACHER																		5
																									SOMEONE ELSE																		6
	A17			Was the person you last had sexual intercourse with older than you, younger than you, or about the same age as you?																					OLDER																		1					A17
																									YOUNGER																		2		→	A19
																									ABOUT THE SAME AGE																		3		→	A19
																									DON'T KNOW/DON'T REMEMBER																	88			→	A19
	A18			Would you say that this person was ten or more years older than you or less than ten years older than you?																					TEN OR MORE YEARS OLDER																		1					A18
																									LESS THAN TEN YEARS OLDER																		2
																									OLDER, UNSURE HOW MUCH																		3
	A19			The last time you had sexual intercourse, was a condom used?																					YES																		1					A19
																									NO																		2
																									DON'T KNOW/DON'T REMEMBER																	88
	A20			Did you use a condom every time you had sexual intercourse with this person in the last 12 months?																					YES																		1					A20
																									NO																		2
																									DON'T KNOW/DON'T REMEMBER																	88
	A21			In total, with how many different people have you had sexual intercourse in the last 12 months?																					NUMBER OF PARTNERS																							A21
																										IN LAST 12 MONTHS [1-35]
																									DON'T KNOW																	88
	A22			In total, with how many different people have you had sexual intercourse in your lifetime?																					NUMBER OF PARTNERS																							A22
																										IN LIFETIME [1-35]
																									DON'T KNOW																	88
	A23_Script			For the following questions, please think about your own experiences and tell me if you agree or disagree with the following about yourself.																																												A23_Script
	A24			You have not always been able to use condoms when you wanted to.																					AGREE																		1					A24
																									DISAGREE																		2
	A25			You have had sex with a person in exchange for protection or a place to stay.																					AGREE																		1					A25
																									DISAGREE																		2
	A26			You have had sex with a person in exchange for him paying rent for you.																					AGREE																		1					A26
																									DISAGREE																		2
	A27			You have had sex because you thought you would get money.																					AGREE																		1					A27
																									DISAGREE																		2
	A28			You have had sex at times when you did not want to.																					AGREE																		1					A28
																									DISAGREE																		2
			SECTION B: UNWANTED PREGNANCIES AND ABORTION
			QUESTIONS																					RESPONSES																					SKIPS
	B1			Sometimes a girl becomes pregnant when she does not want to be. Have you ever been pregnant when you did not want to be?																					YES																		1					B1
																									NO																		2		→	C1
	B2			The last time you had such a pregnancy, what did you do? Did you …?																					NOTHING																		1		→	C1		B2
																									ATTEMPT TO REMOVE PREGNANCY																		2
																									SUCCESSFULLY REMOVE PREGNANCY																		3
																									MISCARRY																		4		→	C1
																									SOMETHING ELSE																		5		→	C1
	B3			Where did you go to remove the pregnancy?																					PUBLIC HEALTH FACILITY																		1		→	C1		B3
																									PRIVATE HEALTH FACILITY																		2
																									TRADITIONAL HEALER																		3		→	C1
																									SOMEONE GAVE SOMETHING TO DRINK																		4		→	C1
																									OTHER																		5		→	C1
	B4			Did you go to a Marie Stopes or a PPAZ clinic or did you go somwhere else?																					MARIE STOPES																		1					B4
																									PPAZ																		2
																									SOMEWHERE ELSE																		3
			SECTION C: HIV/AIDS RISK PERCEPTION
			QUESTIONS																					RESPONSES																					SKIPS
	C1			Do you think your risk of getting infected with HIV is low, medium or high, or do you have no risk at all?																					LOW																		1					C1
																									MEDIUM																		2
																									HIGH																		3
																									NO RISK																		4
																									ALREADY INFECTED																		5
																									DON'T KNOW																	88
			SECTION D: SEXUAL VIOLENCE
			QUESTIONS																					RESPONSES																					SKIPS
	D1			At any time in your life, as a child or as an adult, has anyone ever forced you in any way to have sexual intercourse or perform any other sexual acts?																					YES																		1					D1
																									NO																		2		→	END ACASI
	D2			How old were you the first time you were forced to have sexual intercourse or perform any other sexual acts?																					AGE IN YEARS [5-19]																							D2
																									DON'T KNOW																	88
	D3			Who was the person who was forcing you at that time?																					A BOYFRIEND																		1					D3
																									A FRIEND/ACQUAINTANCE																		2
																									FATHER/STEP-FATHER																		3
																									OTHER RELATIVE																		4
																									TEACHER																		5
																									STRANGER																		6
																									SOMEONE ELSE																		7
	END			If you would like to discuss any of the questions or issues raised in this survey, please feel free to discuss this with the interviewer. The interviewer can provide information to contact a social welfare officer to discuss your concerns, or can contact the social welfare officer for you. Thank you very much for participating in this important study.																																												END
[truncated: 9 more columns]

## Sheet: SchoolingHistory
ENGLISH
Q331: RESPONDENT'S SCHOOLING HISTORY
				A.										B.													C.										D.
				SCHOOL YEAR										SCHOOL ATTENDANCE													GRADE										NAME OF SCHOOL
				[LINE 1, ASK:]										[LINES 2-16, ASK]													What grade did you attend during the [school year]?										What is the name of the school you attended in the [school year]?
				In what school year did you start primary school?										Did you attend school during the [school year]?
																																					[PROBE:] Did you attend any other school(s) during this school year?
				[LINES 2-16:]
				FILL UNTIL YOU REACH CURRENT SCHOOL YEAR (2013)																																	RECORD ALL SCHOOLS MENTIONED
			School year started primary:
	1
			Previous year + 1:											YES = 1						NO = 2
	2
														→ C						→ Next Year
			Previous year + 1:											YES = 1						NO = 2
	3
														→ C						→ Next Year
			Previous year + 1:											YES = 1						NO = 2
	4
														→ C						→ Next Year
			Previous year + 1:											YES = 1						NO = 2
	5
														→ C						→ Next Year
			Previous year + 1:											YES = 1						NO = 2
	6
														→ C						→ Next Year
			Previous year + 1:											YES = 1						NO = 2
	7
														→ C						→ Next Year
			Previous year + 1:											YES = 1						NO = 2
	8
														→ C						→ Next Year
			Previous year + 1:											YES = 1						NO = 2
	9
														→ C						→ Next Year
	IF NEEDED, CONTINUE AT THE BACK OF THE SHEET
Q331 (CONTINUED): RESPONDENT'S SCHOOLING HISTORY
				A.										B.													C.										D.
				SCHOOL YEAR										SCHOOL ATTENDANCE													GRADE										NAME OF SCHOOL
				FILL UNTIL YOU REACH CURRENT SCHOOL YEAR (2013)										Did you attend school during the [school year]?													What grade did you attend during the [school year]?										What is the name of the school you attended in the [school year]?
																																					[PROBE:] Did you attend any other school(s) during this school year?
																																					RECORD ALL SCHOOLS MENTIONED
			Previous year + 1:											YES = 1						NO = 2
	10
														→ C						→ Next Year
			Previous year + 1:											YES = 1						NO = 2
	11
														→ C						→ Next Year
			Previous year + 1:											YES = 1						NO = 2
	12
														→ C						→ Next Year
			Previous year + 1:											YES = 1						NO = 2
	13
														→ C						→ Next Year
			Previous year + 1:											YES = 1						NO = 2
	14
														→ C						→ Next Year
			Previous year + 1:											YES = 1						NO = 2
	15
														→ C						→ Next Year
			Previous year + 1:											YES = 1						NO = 2
	16
														→ C						→ Next Year

## Sheet: WorkIncome
ENGLISH
Q407: RESPONDENT'S WORK IN PAST YEAR
				A.															B.								C.												D.
				Please list all the different kinds of work or activities you have done in the last year, aside from your household chores, starting with the work you are currently doing or did most recently. Include all work or activities or chores, whether or not you received payment.															Did you do this work at home or away from home?								Did you do this work throughout the year, or was it linked to a specific season or time of the year, or you only did it once in a while?												Was this work linked to an agricultural time, to a cultural or religious practice, to school holidays, or to something else?
																			HOME					1			THROUGHOUT YEAR									1			AGRICULTURAL									1
				[PROBE:] Have you done any other work/activities/chores in the last 12 months?															AWAY					2			SEASONAL									2			CULTURAL/RELIGIOUS									2
																			BOTH					3			ONCE IN A WHILE									3			SCHOOL HOLIDAYS									3
																																							SOMETHING ELSE									4
																											[IF C = '1' → E]												NOTHING									5
	1
	2
	3
	4
	5
	6
	7
	8
	REMEMBER TO COMPLETE COLUMNS H, I, J, K, L AT THE BACK OF THE SHEET
Q407 (CONTINUED): RESPONDENT'S INCOME FROM WORK IN PAST YEAR
				A.															H.											I.											J.
				COPY ALL THE WORK/ACTIVITIES LISTED IN COLUMN A, FOLLOWING THE SAME ORDER.															Were you paid in cash or kind for this work or were you not paid at all?											Were you paid in cash daily, weekly, monthly, or on what basis?											On average, each time you were paid in cash for doing this work, how much were you paid?
																			CASH ONLY								1			DAILY								1			ENTER AMOUNT IN KWACHA REBASED
																			CASH AND KIND								2			WEEKLY								2
																			IN KIND ONLY								3			EVERY TWO WEEKS								3
																			NOT PAID								4			MONTHLY								4
																														SEASONAL								5
																			[IF H = '3' OR '4' → NEXT LINE]											OTHER (SPECIFY)								6
	1
	2
	3
	4
	5
	6
	7
	8

## Sheet: Expenses
ENGLISH
Q412: RESPONDENT'S EXPENSES IN PAST MONTH
				A.															B.									C.														D.
				TYPE OF EXPENDITURE															In the past month, did you spend money on […]?									About how much did you spend on […] in the past month?														Did you use your own money to pay for […] or did other person(s) give you money to pay for […]?
																			YES						1				ENTER AMOUNT IN KWACHA REBASED													OWN MONEY ONLY
																			NO						2																	OWN MONEY & OTHERS
																																										OTHERS MONEY ONLY
																			[IF B = '2' → NEXT LINE]
				FOOD, CHIPS, SWEETS, DRINKS/SODA
	1
	2			CLOTHES/SHOES
				PERSONAL ITEMS (BEAUTY PRODUCTS, SANITARY TOWELS, UNDERWEAR)
	3
	4			BEAUTY SERVICES
	5			TALK TIME
				ENTERTAINMENT (FILMS, SPORT, MUSIC, PARTIES/FUNCTIONS)
	6
	7			TRANSPORT
	8			OTHER _____________________
	REMEMBER TO COMPLETE
	COLUMNS G, H, I, J, K, L, M
	AT THE BACK OF THE SHEET
Q412 (CONTINUED): RESPONDENT'S EXPENSES IN PAST YEAR
				G.															H.							I.										J.													K.
				TYPE OF EXPENDITURE															In the past year, did you spend money on […]?							About how much did you spend on […] in the past year?										Was this expenditure linked to a specific season or agricultural time, to a cultural or religious practice, to a specific time in the school year, or to something else?													Did you use your own money to pay for […] or did other person(s) give you money to pay for […]?
																			YES				1			ENTER AMOUNT IN KWACHA REBASED
																			NO				2
																																				SEASON/AGRICULTURAL										1			OWN MONEY ONLY
																																				CULTURAL/RELIGIOUS										2			OWN MONEY & OTHERS
																			[IF H = '2' → NEXT LINE]																	SCHOOL										3			OTHERS MONEY ONLY
																																				SOMETHING ELSE										4
																																				NOTHING										5
	9			SCHOOL SUPPLIES
	10			SCHOOL FEES
	11			EXAM FEES
	12			RENT
	13			INVESTING IN BUSINESS
				HEALTH (MEDICAL SERVICES, MEDICINES, FAMILY PLANNING, HOSPITAL)
	14
				TRANSPORT FOR HEALTH SERVICES
	15
	16			FUNERAL
	17			MOBILE PHONE
	18			OTHER _____________________

## Sheet: Savings
ENGLISH
Q422: RESPONDENT'S SAVINGS IN PAST YEAR
				A.												B.								C.								D.										E.
				TYPE OF EXPENDITURE												In the past year, have you saved your money in this place?								About how much do you currently have saved in this place?								In the past year, how often did you put money in this place: every week, every month, a few times a year, only once?										Were the times when you put money in this place linked to a specific season or agricultural time, to a cultural or religious practice, to a specific time in the school year, or to something else?
																YES					1			ENTER AMOUNT IN KWACHA REBASED								EVERY WEEK							1
																NO					2											EVERY MONTH							2
																																A FEW TIMES							3			SEASON/AGRICULTURAL
																																ONLY ONCE							4			CULTURAL/RELIGIOUS
																																										SCHOOL
																[IF B = '2' → NEXT LINE]																[IF D = '1' OR '2' → F]										SOMETHING ELSE
																																										NOTHING
				AT HOME (UNDER THE MATTRESS, IN A BOX, HOLE IN THE GROUND)
	1
	2			WITH A FRIEND
				WITH PARENTS/ GUARDIAN
	3
				SAVINGS GROUP/ KALOBA/ICHILIMBA
	4
	5			BANK ACCOUNT
	6			SHOPKEEPER
				AGRICULTURAL INVESTMENTS
	7
	8			OTHER ______________
											1 = FOOD FOR YOURSELF															4 = SCHOOL SUPPLIES FOR YOURSELF																	7 = GIFTS
	EXPENSE CODES FOR H										2 = FOOD FOR YOUR FAMILY															5 = SCHOOL FEES FOR SOMEONE ELSE																	8 = SANITARY TOWELS
											3 = SCHOOL FEES FOR YOURSELF															6 = TRANSPORT																	9 = CLOTHES OR PERSONAL CARE

## Sheet: SocialNetworks
ENGLISH
Q512: RESPONDENT'S SOCIAL NETWORK
				I want you to think about the five friends with whom you spend the most time, and whom you consider to be your closest friends. I am going to ask you some questions about each of these friends.
																																			1												2
	A			What is your friend's full name? Does your friend go by a nickname?																												FULL NAME
																																NICKNAME
	B			Is [FRIEND] a male or a female?																											MALE	1
																															FEMALE	2
	C			What is the name of the place where [FRIEND] lives?																												PLACE NAME
	D			How old is [FRIEND]?																												AGE
	E			For how long have you and [FRIEND] known each other?																												MONTHS
																																YEARS
	F			Does [FRIEND] go to school?																											YES	1
																															NO	2
				[IF YES:] What is the name of the school that [FRIEND] attends?																												SCHOOL NAME
	G			[IF FRIEND IN SCHOOL:] What grade is [FRIEND] attending?																												GRADE: 1-12
																																IF HIGHER THAN 12: 13
				[IF FRIEND NOT IN SCHOOL:] How many grades did [FRIEND] complete?																					IF NEVER WENT TO SCHOOL: 0
	H			What is [FRIEND]'s religious denomination?																			RELIGION CODES BELOW
				What church/mosque does [FRIEND] usually go to?																			NAME CHURCH OR MOSQUE
	REMEMBER TO COMPLETE																						RELIGION CODES
	ROWS I, J, K, L, M																						1 = CATHOLIC
	AT THE BACK OF THE SHEET																						2 = PROTESTANT
																							3 = MUSLIM
																							4 = OTHER (SPECIFY________)
																							5 = NO RELIGION
Q512 (CONTINUED): RESPONDENT'S SOCIAL NETWORK
																																			1												2
				[IF FRIEND'S AGE < 15 → K]
	I			Is [FRIEND] married or has ever been married?																			NEVER MARRIED									1
																							CURRENTLY MARRIED									2
																							FORMERLY MARRIED									3
	J			Does [FRIEND] have any children or is currently pregnant?																			YES									1
																							NO									2
	K			When was the last time that you saw or talked to [FRIEND]?																			TODAY									1
																							PAST WEEK									2
																							PAST MONTH									3
																							PAST YEAR									4
																							MORE THAN A YEAR AGO									5
	L			[IF K = '5' → NEXT FRIEND]																			EVERY DAY									1
				How often do you usually see or talk to [FRIEND]?																			AT LEAST ONCE A WEEK									2
																							AT LEAST ONCE A MONTH									3
																							A FEW TIMES A YEAR									4
	M			What kind of things do you and [FRIEND] talk about […]?																															1 = SPONTANEOUS												1 = SPONTANEOUS
				[DO NOT READ LIST; RECORD ALL TOPICS SHE MENTIONS SPONTANEOUSLY]																															2 = AFTER PROBING												2 = AFTER PROBING
																																			3 = NO												3 = NO
				[FOR TOPICS NOT MENTIONED, ASK:] Do you ever talk about […]?
																	a.		SCHOOL																a.		1		2		3						a.		1
																	b.		WORK																b.		1		2		3						b.		1
																	c.		MONEY/SAVINGS																c.		1		2		3						c.		1
																	d.		RELIGION																d.		1		2		3						d.		1
																	e.		ASPIRATIONS																e.		1		2		3						e.		1
																	f.		ROMANTIC RELATIONSHIPS/SEX																f.		1		2		3						f.		1
																	g.		MARRIAGE																g.		1		2		3						g.		1
																	h.		CHILDBEARING/FAMILY PLANNING																h.		1		2		3						h.		1
																	i.		HIV/AIDS																i.		1		2		3						i.		1

## Sheet: HealthServices
ENGLISH
Q708: USE OF HEALTH SERVICES IN PAST YEAR
				A.																		B.												C.											D.
				HEALTH FACILITY																		When did you visit this facility?												What service(s) did you seek at this facility?											Did you receive all the service(s) you were seeking when you visited this facility?
				I would like to talk about each time that you went to a health facility in the past year, starting with the last (most recent) time that you went.
				What is the name of the health facility that you went to?																		ENTER MONTH AND YEAR												RECORD SERVICE CODE(S)
				What type of health facility is this?																																										YES			1
				RECORD NAME OF PLACE AND FACILITY CODE																																										NO			2
				NAME:																		MONTH:
	1
				FACILITY CODE:																		YEAR:
				NAME:																		MONTH:
	2
				FACILITY CODE:																		YEAR:
				NAME:																		MONTH:
	3
				FACILITY CODE:																		YEAR:
				NAME:																		MONTH:
	4
				FACILITY CODE:																		YEAR:
				NAME:																		MONTH:
	5
				FACILITY CODE:																		YEAR:
				NAME:																		MONTH:
	6
				FACILITY CODE:																		YEAR:
				NAME:																		MONTH:
	7
				FACILITY CODE:																		YEAR:
				NAME:																		MONTH:
	8
				FACILITY CODE:																		YEAR:
				NAME:																		MONTH:
	9
				FACILITY CODE:																		YEAR:
Q708 (CONTINUED): USE OF HEALTH SERVICES IN PAST YEAR
				A.																		F.										G.											H.
				HEALTH FACILITY																		Who was/were the health provider(s) of the service(s) you received?										About how much did you spend at the health facility (include cost of any medicines)?											How much time did you spend at the health facility (including waiting time, time with health personnel, time to get medicine)?
				COPY ALL THE HEALTH FACILITY VISITS LISTED IN COLUMN A, FOLLOWING THE SAME ORDER.
																						RECORD ALL PERSONNEL CODES THAT APPLY										ENTER AMOUNT IN KWACHA REBASED OR "0" IF NO PAYMENT
																																												ENTER TIME IN HOURS AND MINUTES
																																											HOURS:
	1
																																											MINUTES:
																																											HOURS:
	2
																																											MINUTES:
																																											HOURS:
	3
																																											MINUTES:
																																											HOURS:
	4
																																											MINUTES:
																																											HOURS:
	5
																																											MINUTES:
																																											HOURS:
	6
																																											MINUTES:
																																											HOURS:
	7
																																											MINUTES:
																																											HOURS:
	8
																																											MINUTES:
																																											HOURS:
	9
																																											MINUTES:

## Sheet: LitMatCog
ENGLISH																																																NYANJA
			LITERACY, MATHEMATIC, AND COGNITIVE EVALUATION
			IDENTIFICATION
				AGEP ID:
				PROVINCE:																					RESPONDENT'S HIGHEST GRADE COMPLETED:
				SITE:																					RESPONDENT'S SCHOOLING STATUS:
																																IN PRIMARY											1
																																IN SECONDARY											2
																																IN HIGHER											3
																																IN OTHER											4
																																OUT OF SCHOOL											5
			INTERVIEWER'S FINAL VISIT
				DATE:				DAY					MONTH					YEAR							INTERVIEWER ID:
																		2013
				RESULT:																					LANGUAGE:
					COMPLETED																	1										ENGLISH											1
					PARTIALLY COMPLETED																	21										NYANJA											2
					REFUSED																	3										BEMBA											3
					INCAPABLE PHYSICALLY OR MENTALLY																	9										KAONDE											4
					OTHER, FINAL ___________________																	15										OTHER _____________											5
					OTHER, REVISIT__________________																	27
				SUPERVISOR ID:										CHECKED BY:											LOGGED BY:										ENTERED BY:
				DATE:										DATE:											DATE:										DATE:
			SECTION A: LITERACY EVALUATION
	A0			RECORD THE TIME BEGUN SECTION A																											HOUR							MINUTES											A0
				USE 24 HOUR TIME
				Now I would like you to read this sentence to me.
				[SHOW SENTENCES TO RESPONDENT]
				[IF RESPONDENT CANNOT READ WHOLE SENTENCE, PROBE:]
				Can you read any part of the sentence to me?
	A1			[SENTENCE IN NYANJA]																					CANNOT READ AT ALL																		1						A1
				Ulimi ninchito yolimba.																					READ ONLY PARTS OF THE SENTENCE																		2
																									READ WHOLE SENTENCE																		3
	A2			[SENTENCE IN LOCAL LANGUAGE 2]																					CANNOT READ AT ALL																		1						A2
				Indicate chosen language:													NYANJA					1			READ ONLY PARTS OF THE SENTENCE																		2
																	BEMBA					2			READ WHOLE SENTENCE																		3
																	KAONDE					3
	A3			[SENTENCE IN ENGLISH 1]																					CANNOT READ AT ALL																		1						A3
				Parents love their children.																					READ ONLY PARTS OF THE SENTENCE																		2
																									READ WHOLE SENTENCE																		3
	A4			[SENTENCE IN ENGLISH 2]																					CANNOT READ AT ALL																		1						A4
				Children work hard in school.																					READ ONLY PARTS OF THE SENTENCE																		2
																									READ WHOLE SENTENCE																		3
	A5			RECORD THE TIME END SECTION A																											HOUR							MINUTES											A0
				USE 24 HOUR TIME
			SECTION B: MATHEMATICAL EVALUATION
				[HAND THE QUESTIONNAIRE TO THE PARTICIPANT FOR THE ENTIRE MATHEMATICAL EVALUATION SECTION AND ASSIST THE PARTICIPANT IN INSERTING THEIR ANSWERS IN THE CORRECT PLACE. IF THE PARTICIPANT HAS QUESTIONS ABOUT THE PROBLEMS, YOU MAY HELP HER TO UNDERSTAND THE MEANING OF A QUESTION BUT DO NOT ASSIST HER IN FINDING THE ANSWER. LET THE RESPONDENT KNOW HOW LONG SHE WILL HAVE TO COMPLETE THE EXERCISE AND MA…
																																													TIME LIMIT
				[IF RESPONDENT'S HIGHEST GRADE COMPLETED IS 4 OR LOWER: ASK TO COMPLETE B1-B10]																																									15 MINUTES
				[IF RESPONDENT'S HIGHEST GRADE COMPLETED IS 5 OR 6: ASK TO COMPLETE B1-B15]																																									20 MINUTES
				[IF RESPONDENT'S HIGHEST GRADE COMPLETED IS 7 OR HIGHER: ASK TO COMPLETE B1-B20]																																									25 MINUTES
	B0			RECORD THE TIME BEGUN SECTION B																											HOUR							MINUTES											B0
				USE 24 HOUR TIME
			SECTION B: MATHEMATICAL EVALUATION
	B1			Write the missing number:																																													B1
																14, 15, ____, 17, ____, 19, 20, ____, ____, 23.
	B2			Write these numbers in order starting from the biggest number to the smallest																																													B2
				8, 10, 5, 11, 4:
																____, ____, ____, ____, ____.
	B3			Adding:																																		258											B3
																8 + 5 =																					+	310
	B4			Subtracting:																																		494											B4
																15 ─ 9 =																					─	253
	B5			Multiplying:																																		29											B5
																4 x 7 =																					x		5
	B6			Dividing:																																													B6
																18 ÷ 6 =															735 ÷ 3 =
	B7			Fractions:																																													B7
													1		+		3		=										5		─		2		=
													7				7												9				9
	B8			Chilufya borrowed K 18 from his father. He paid back K 11.																																													B8
				How much was left to pay?
	B9			A teacher shared 45 sweets between 9 pupils. If the pupils had equal shares, how many sweets did each pupil receive?																																													B9
	B10			How many half-kg packets of sugar weigh 3 kg?																																													B10
			SECTION B: MATHEMATICAL EVALUATION
				Here are a few more questions where you can use your mathematical skills.
	B11			A baker made 5453 buns on Friday and 7874 buns on Saturday.																																													B11
				Find the number of buns which were baked in the two days.
	B12			A man bought a bicycle at K 15 and sold it at K 20.																																													B12
				What was his profit in kwacha?
	B13			A tailor made a dress at a cost of K 35 and sold it at K 29.																																													B13
				What loss in kwacha did she make?
	B14			Chicai started walking from her home at 07 10 hrs and reached school at 08 20 hrs. How long did she take?																																													B14
	B15			Find the area of a square whose length is 6 cm.																																													B15
				Here are few more problems that you can solve using your mathematical skills.
	B16																	3		+		1		=																									B16
																		4				5
	B17			Change 0.27 into a percentage.																																													B17
	B18			Find the missing number.																									x		7		=		21														B18
	B19			If x + 3 = 10, what is x equal to?																																													B19
	B20			Liseli leaves K 800 in her bank savings account for one year. The simple interest paid by the bank is 5% per year. Find the new balance of Liseli's account at the end of one year.																																													B20
	B21			RECORD THE TIME END SECTION B																											HOUR							MINUTES											B21
				USE 24 HOUR TIME
			SECTION D: COGNITIVE EVALUATION
				The following is a game. I am going to show you a few diagrammatic drawings. Each drawing contains a pattern that has one piece missing. For the missing piece, you will be shown different choices for ways to fill in the blank area. I would like you to consider all the available choices and then select the piece that you think best fits into the patterned drawing that you are looking at. Think of …
				[FOR EACH DRAWING, RECORD THE NUMBER OF THE MISSING PIECE (1, 2, 3, 4, 5, OR 6) THAT THE PARTICIPANT SELECTS; IF THE PARTICIPANTS SAYS DON'T KNOW, RECORD 88. IF THE PARTICIPANT DOES NOT WANT TO ANSWER, RECORD 77.]
	D0			RECORD THE TIME BEGUN SECTION D																											HOUR							MINUTES											D0
				USE 24 HOUR TIME
				PRACTICE						D1																					D10
				PRACTICE						D2																					D11
										D3																					D12
										D4																					D13
										D5																					D14
										D6																					D15
										D7																					D16
										D8																					D17
										D9																					D18
	D19			RECORD THE TIME END SECTION D																											HOUR							MINUTES											D19
				USE 24 HOUR TIME

[truncated: 4 more sheets: AnthroForm, Biomarker, ContactInfo, Informants]
